# Supplementary material for: Potential increase in coastal wetland vulnerability to sea-level rise suggested by considering hydrodynamic attenuation effects
Source: PubMed Central journal article supplement (PMC5511368; doi:10.1038/ncomms16094), 2017-07-13
Supplement: ncomms16094-s1.pdf [file ncomms16094-s1.pdf]

File name: Supplementary Information

Description: Supplementary Figures and Supplementary Tables

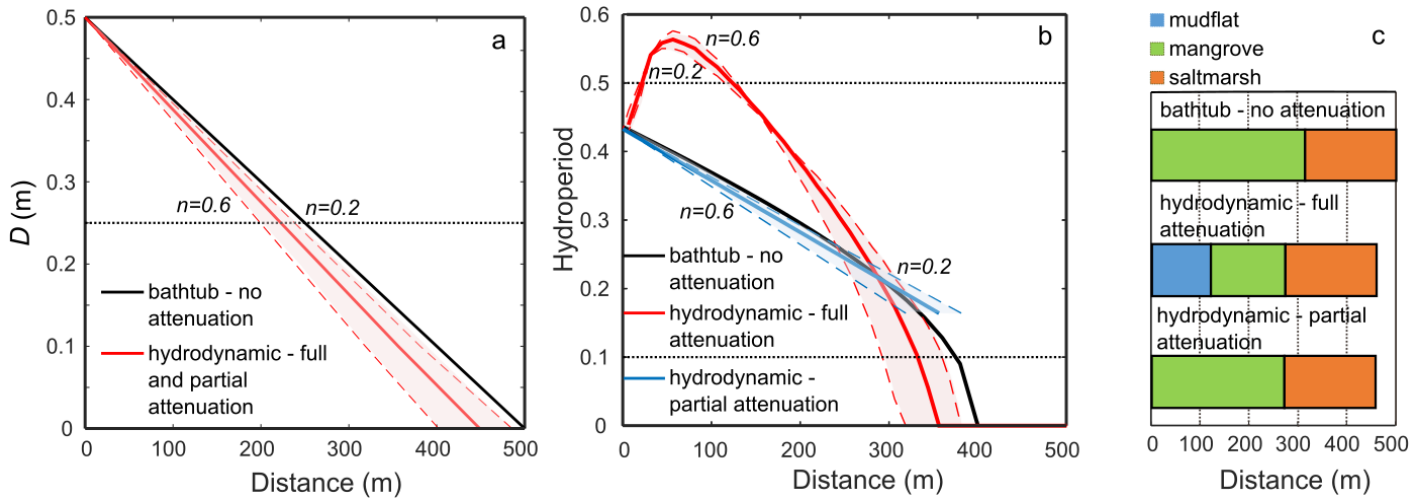

**Supplementary Figure 1 | Vegetation prediction using full attenuation and simplified partial attenuation flow models.** **a**, Changes in  $D$  obtained from both models are identical and show the effects of attenuation on  $D$  assuming a vegetative flow resistance that corresponds to saltmarsh and mangrove, represented by a range of Manning's  $n$  values from 0.2 to 0.6 (shaded areas) with a mean of 0.4 (solid line). **b**, Changes in hydroperiod computed at an offset of 14 cm along the tidal flat for both approaches indicate a significant impact of attenuation on the hydroperiod when full attenuation is considered, which is not captured by the simplified partial attenuation model. **c**, Vegetation distribution simulated using the two modelling approaches shows that the partial attenuation approach produces a distribution very close to the results using the bathtub model.

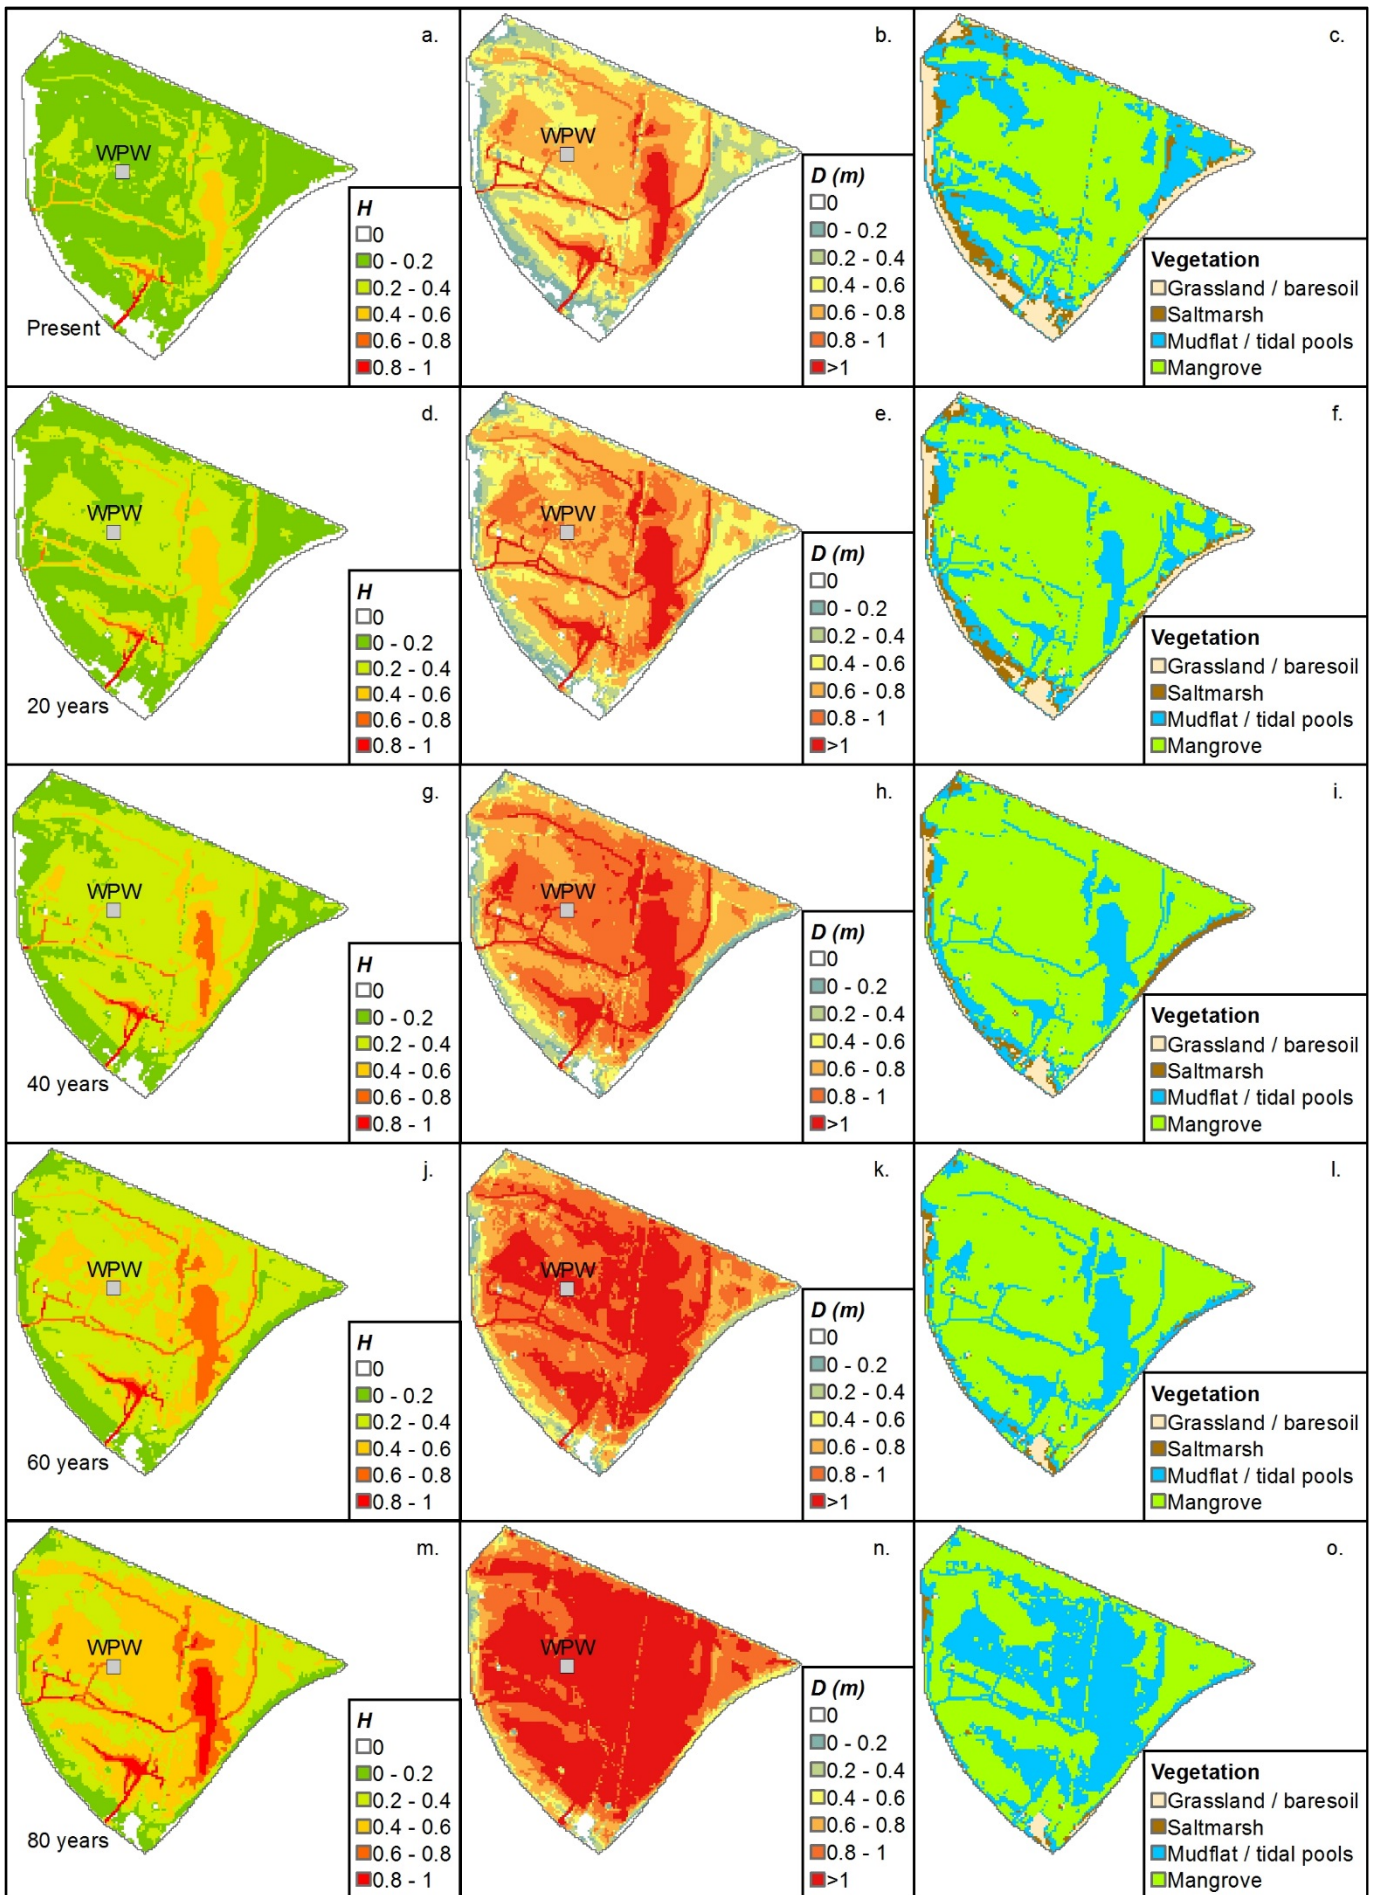

**Supplementary Figure 2 | Long term wetland evolution for constant rate of sea-level rise and constant rate of soil surface elevation change using the “bathtub” approach without considering the effects of flow attenuation.**  
 $H$  = hydroperiod,  $D$  = depth below mean high tide

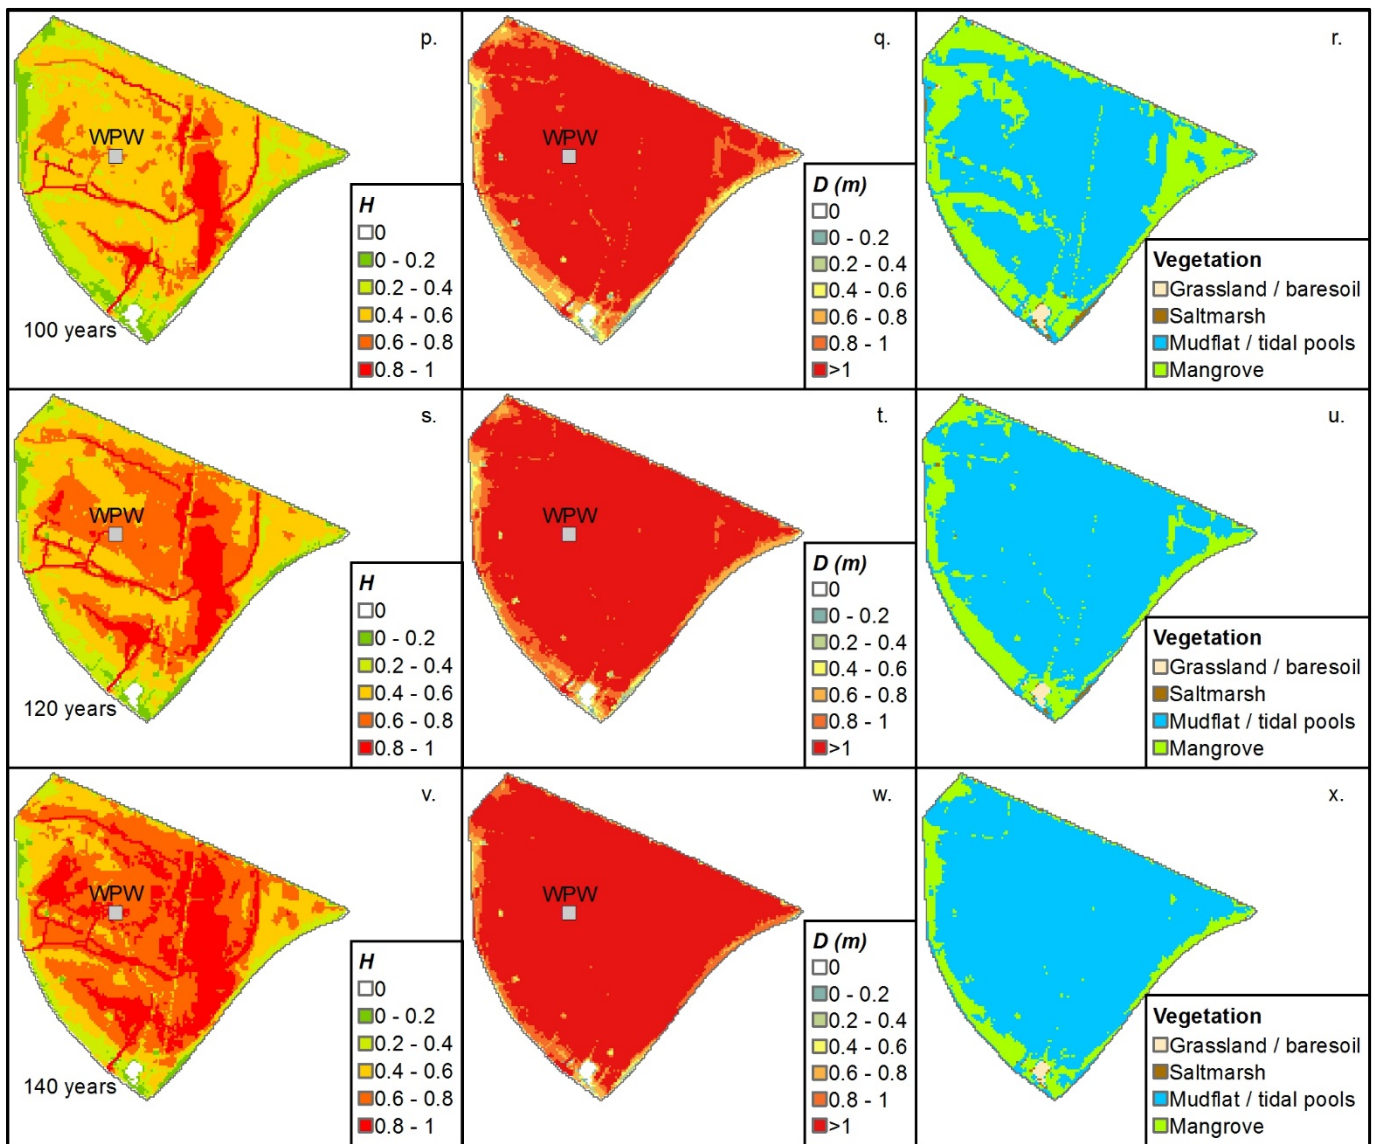

Supplementary Figure 2 (cont.)

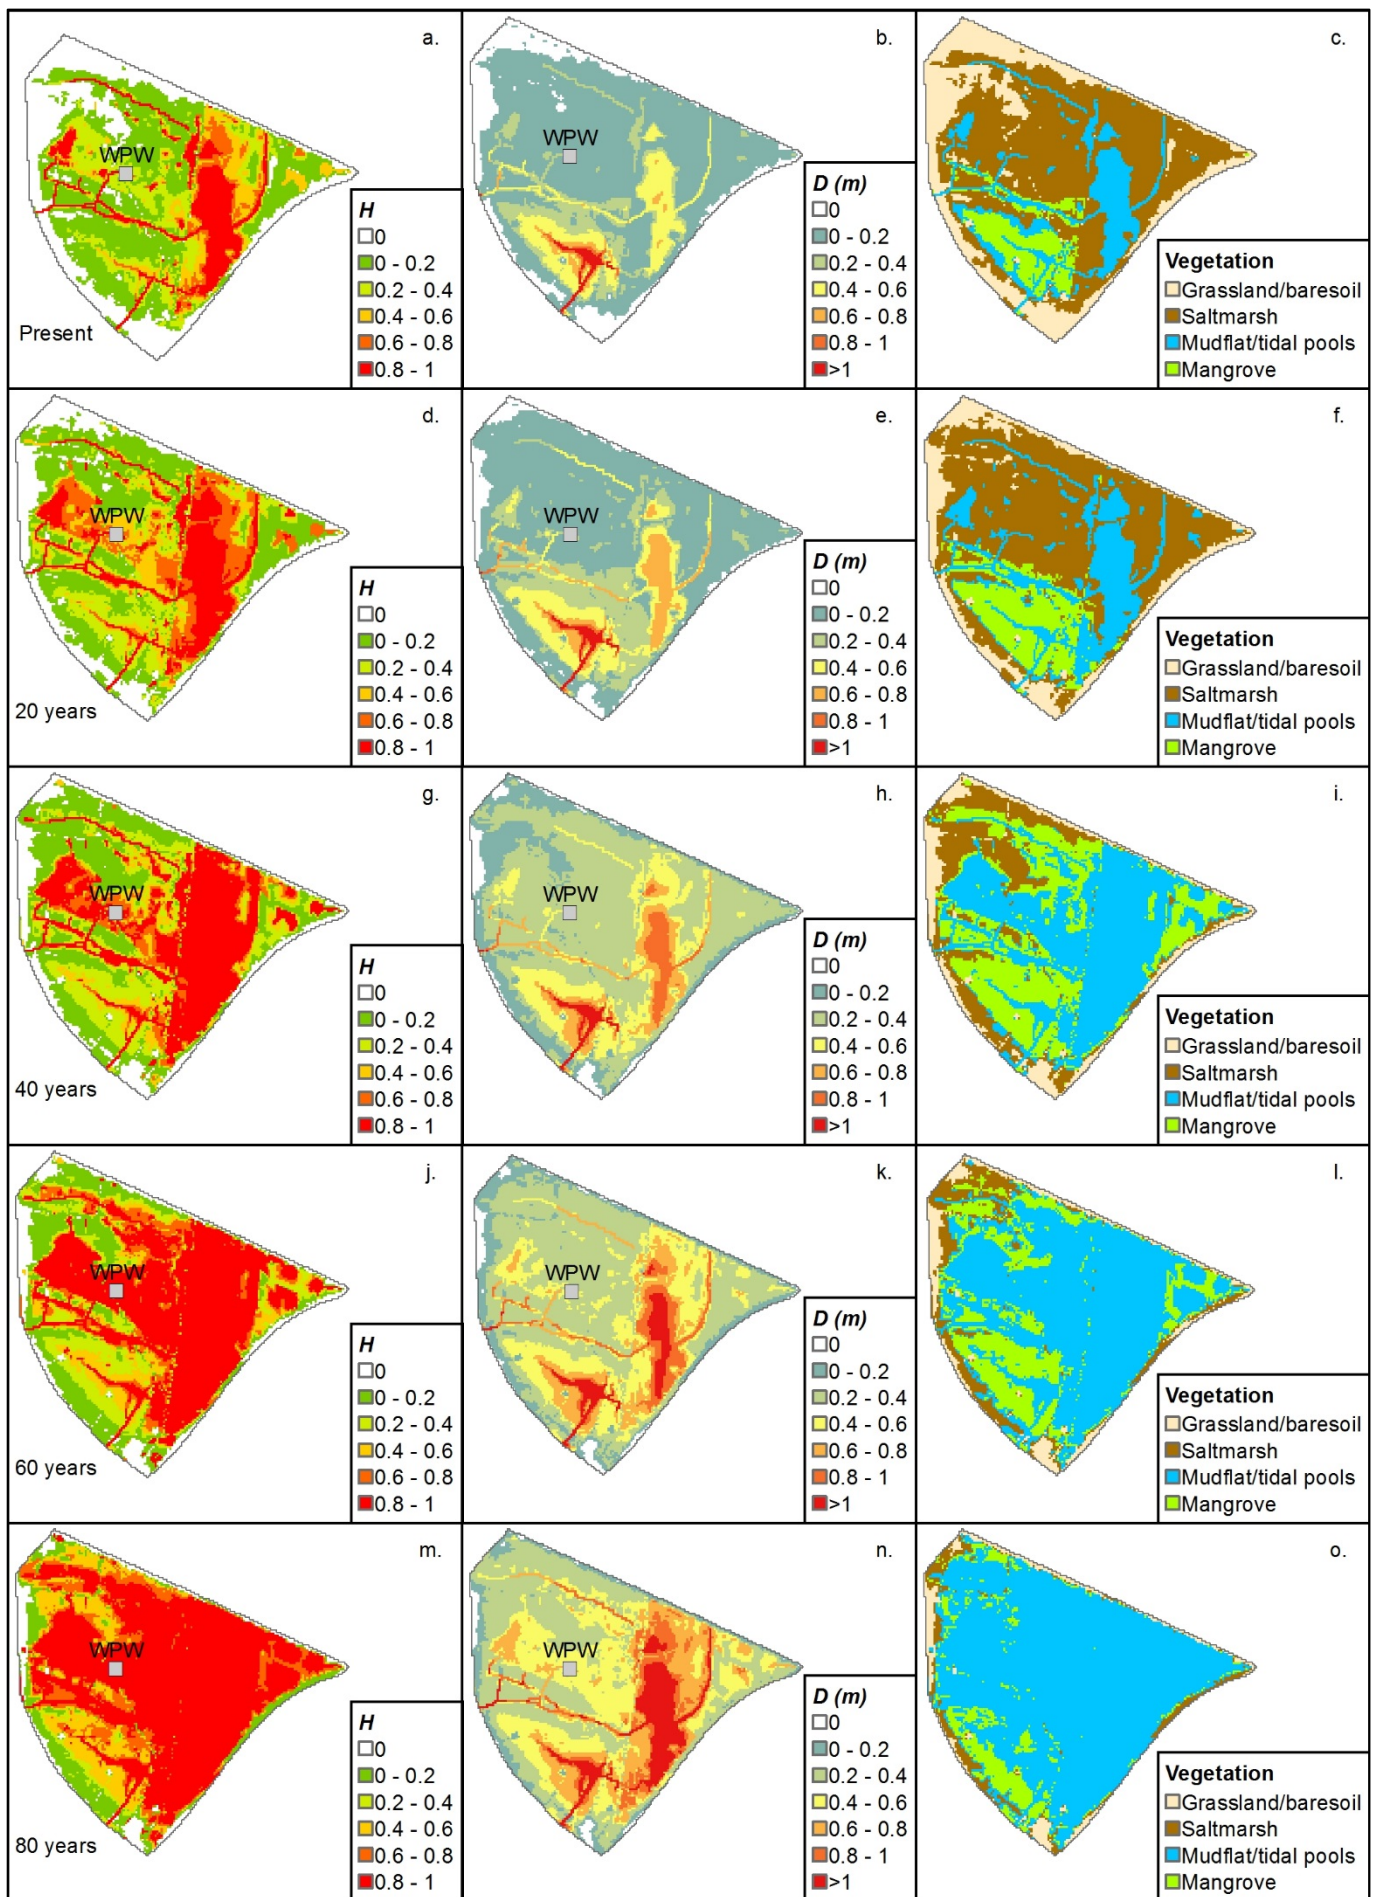

**Supplementary Figure 3 | Long term wetland evolution for constant rate of sea-level rise and constant rate of soil surface elevation change using the hydrodynamic approach considering the full effects of flow attenuation.**  
 $H$  = hydroperiod,  $D$  = depth below mean high tide.

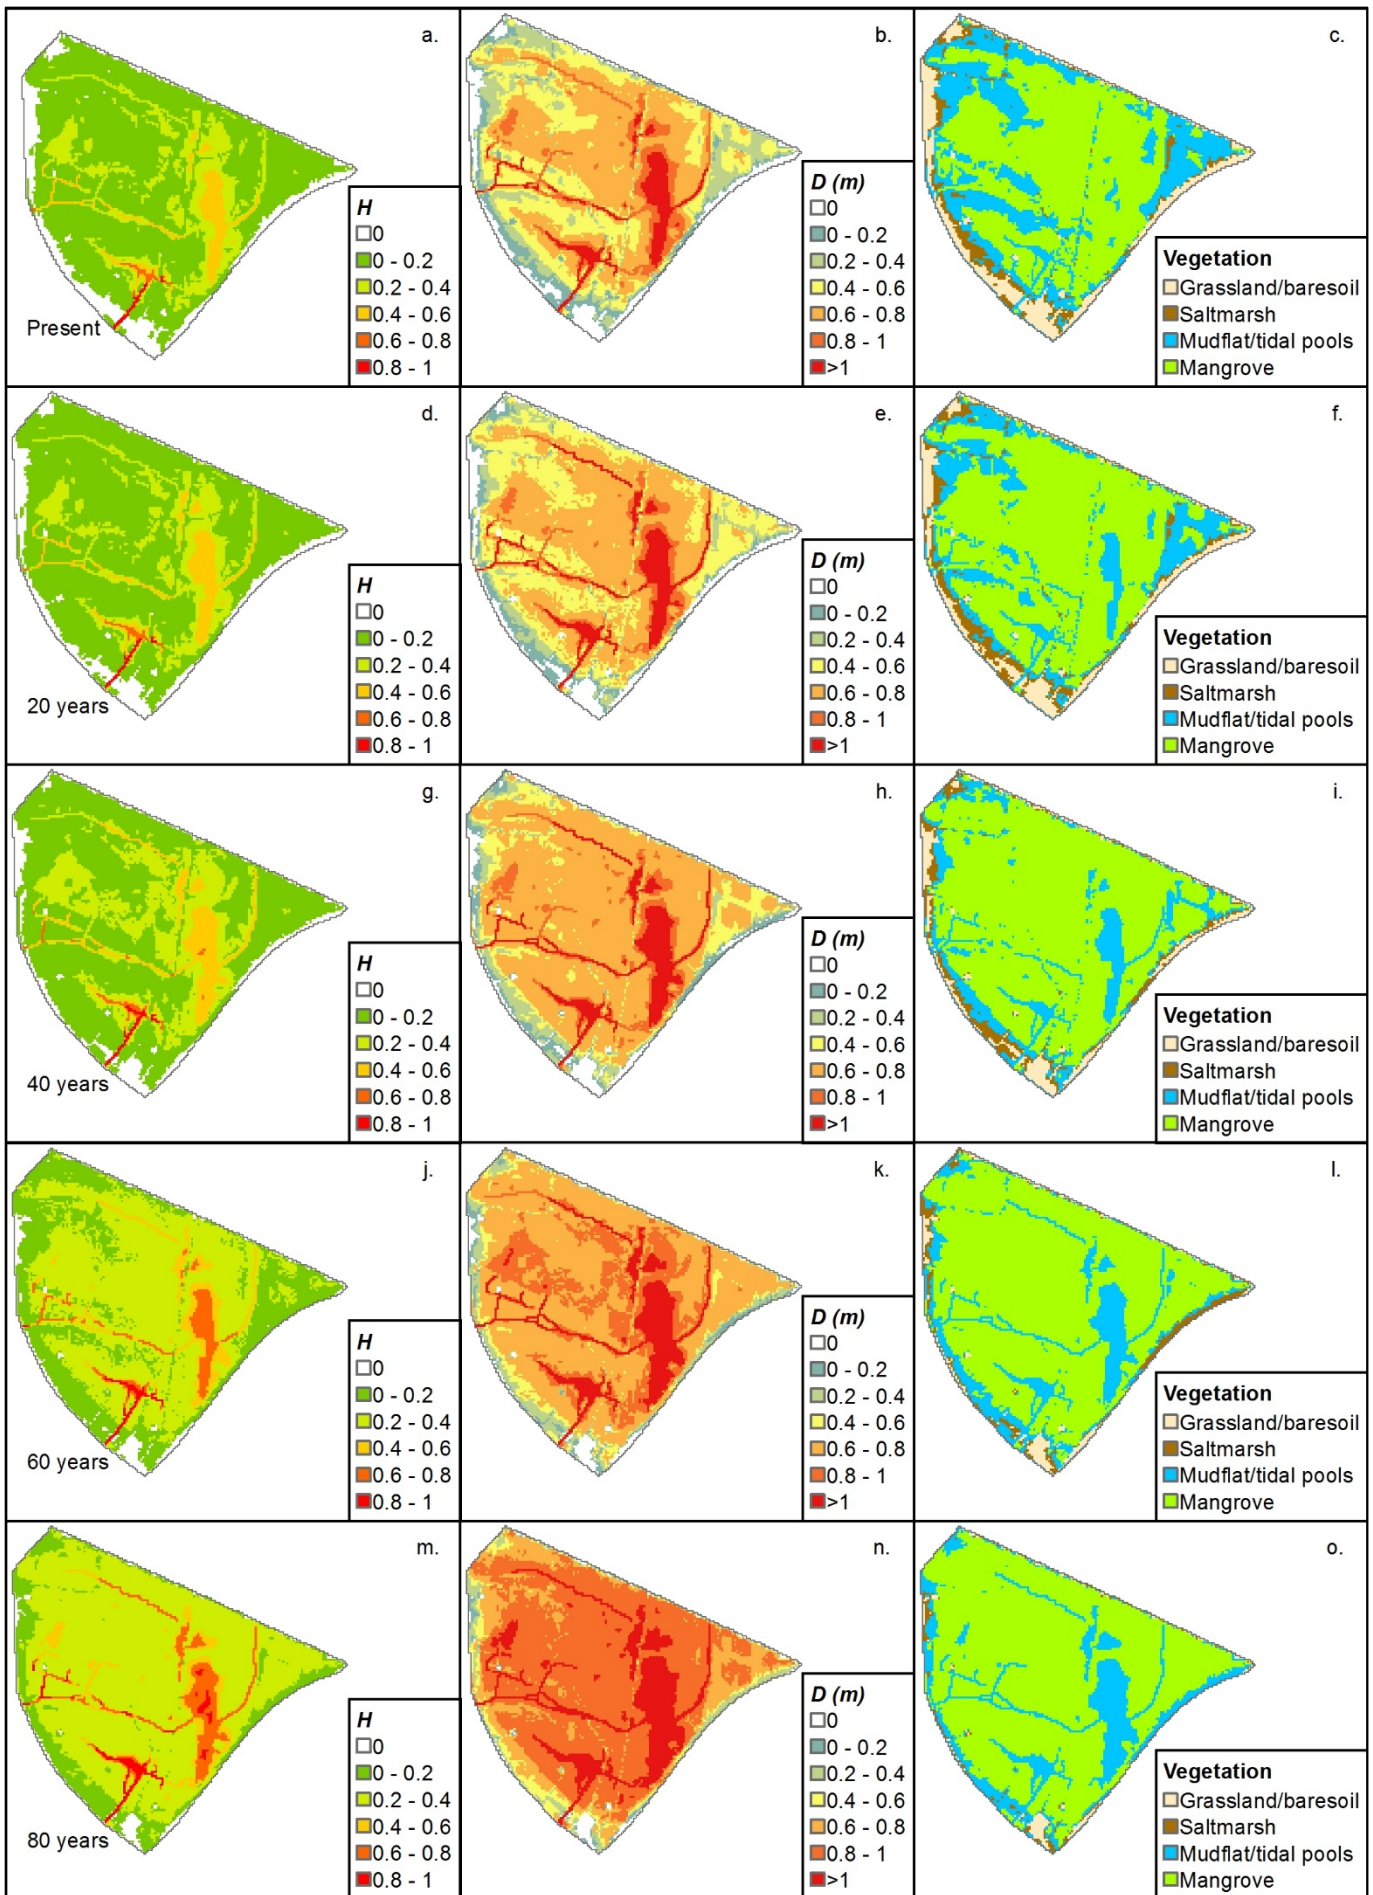

Supplementary Figure 4 | Long term wetland evolution for variable rate of sea-level rise and variable rate of soil surface elevation change with low sediment load using the "bathtub" approach without considering the effects of flow attenuation.  $H$  = hydroperiod,  $D$  = depth below mean high tide

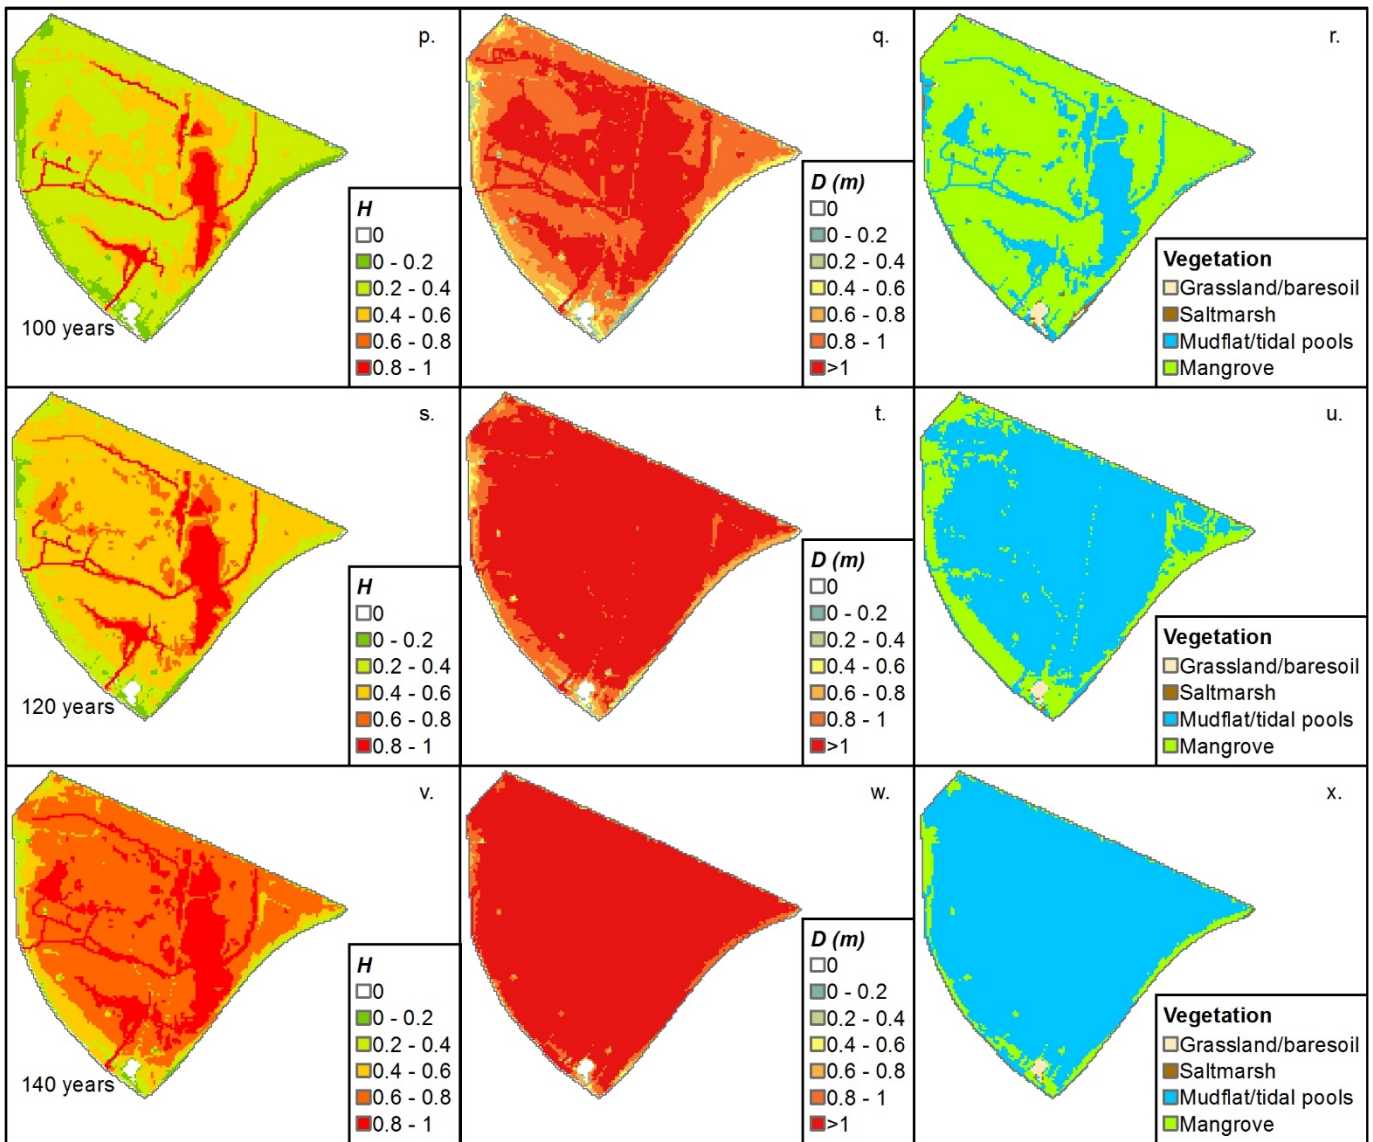

Supplementary Figure 4 (cont.)

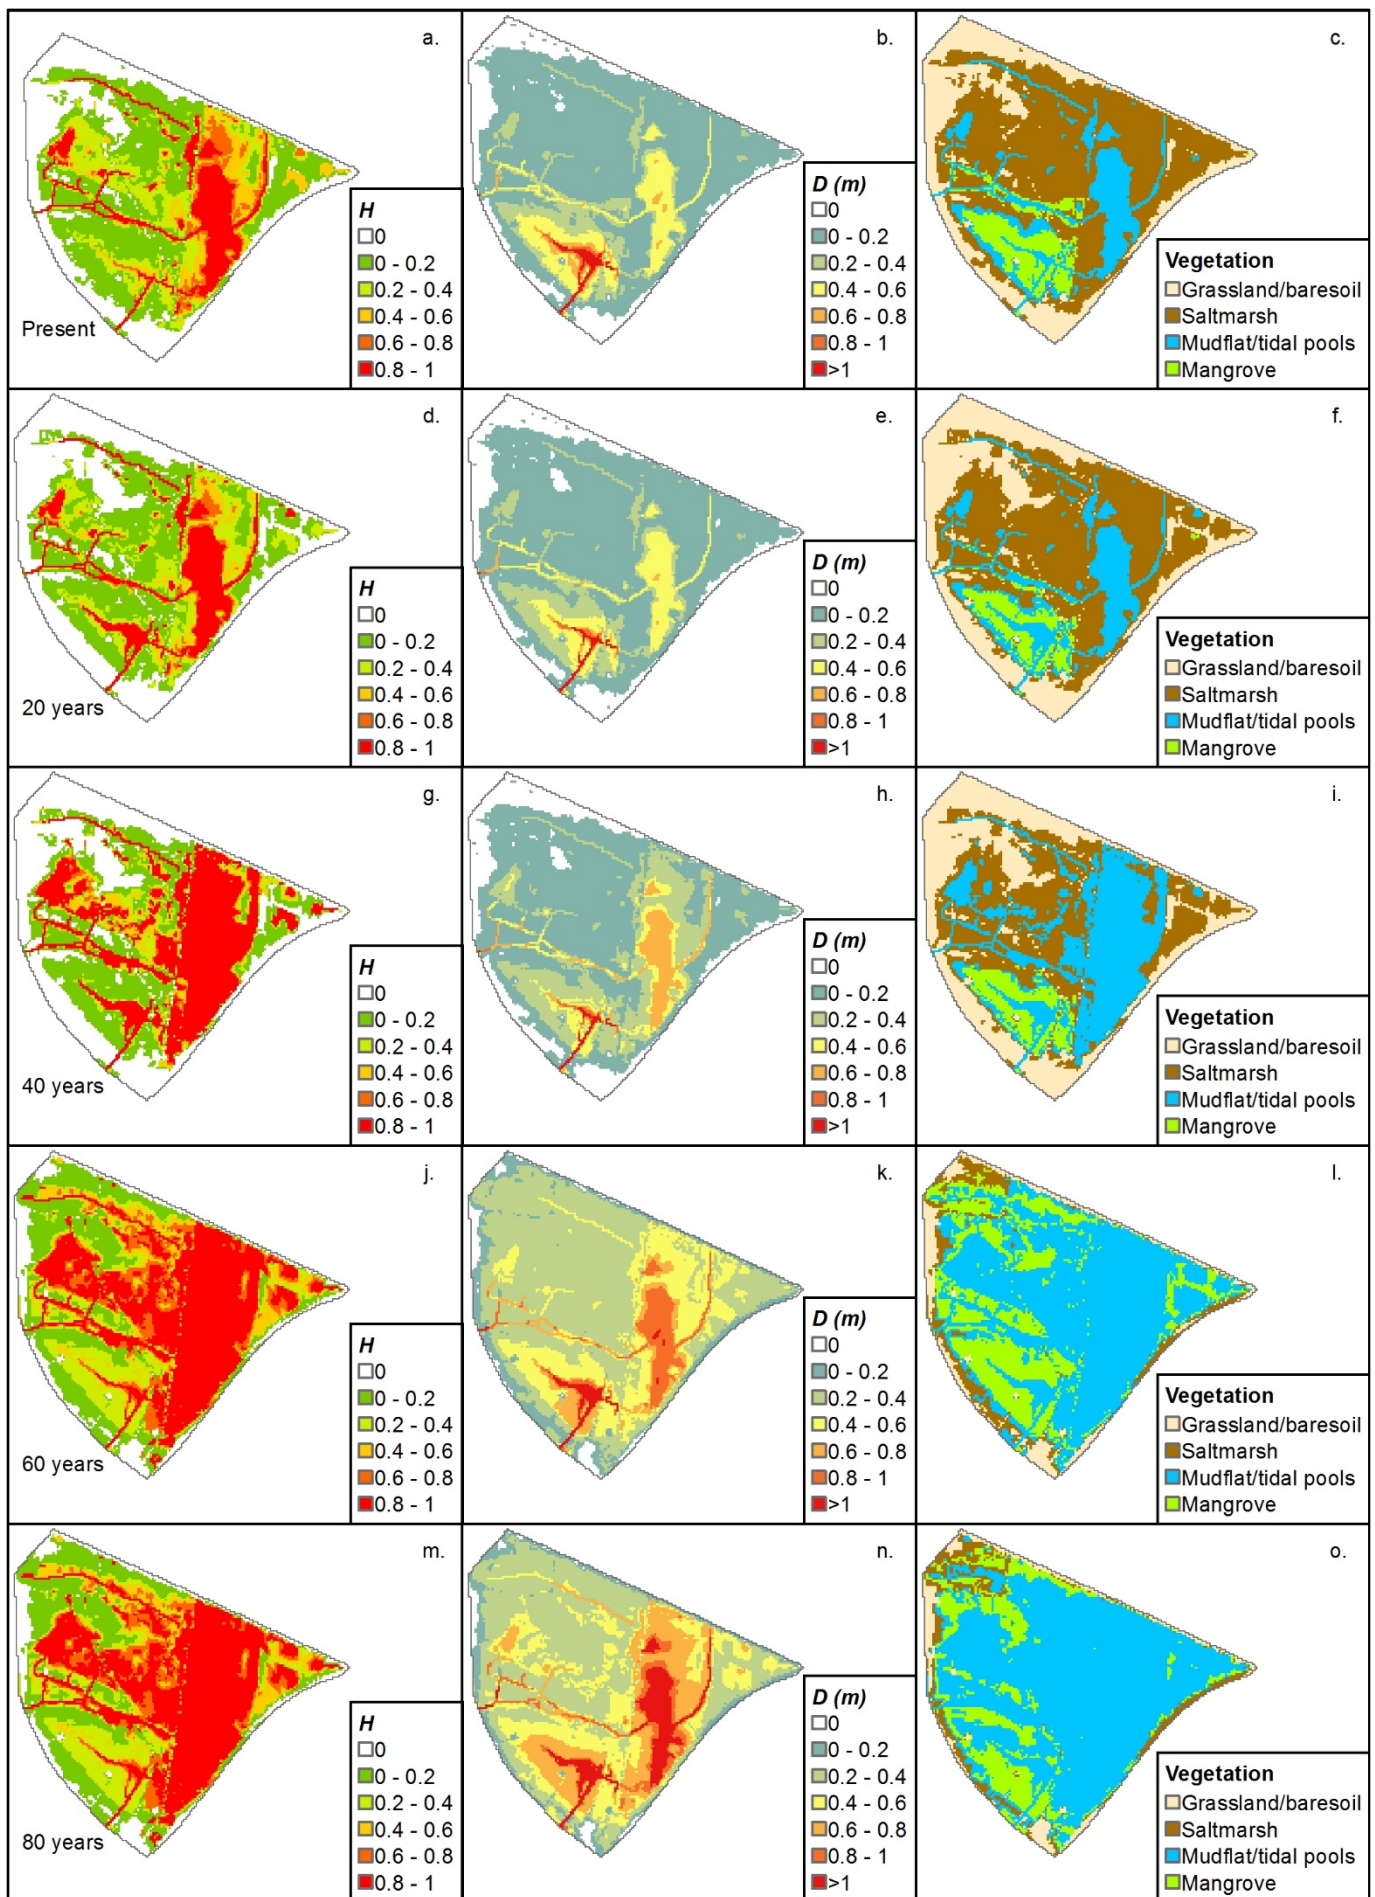

**Supplementary Figure 5 | Long term wetland evolution for variable rate of sea-level rise and variable rate of soil surface elevation change with low sediment load using the hydrodynamic approach considering the full effects of flow attenuation.  $H$  = hydroperiod,  $D$  = depth below mean high tide.**



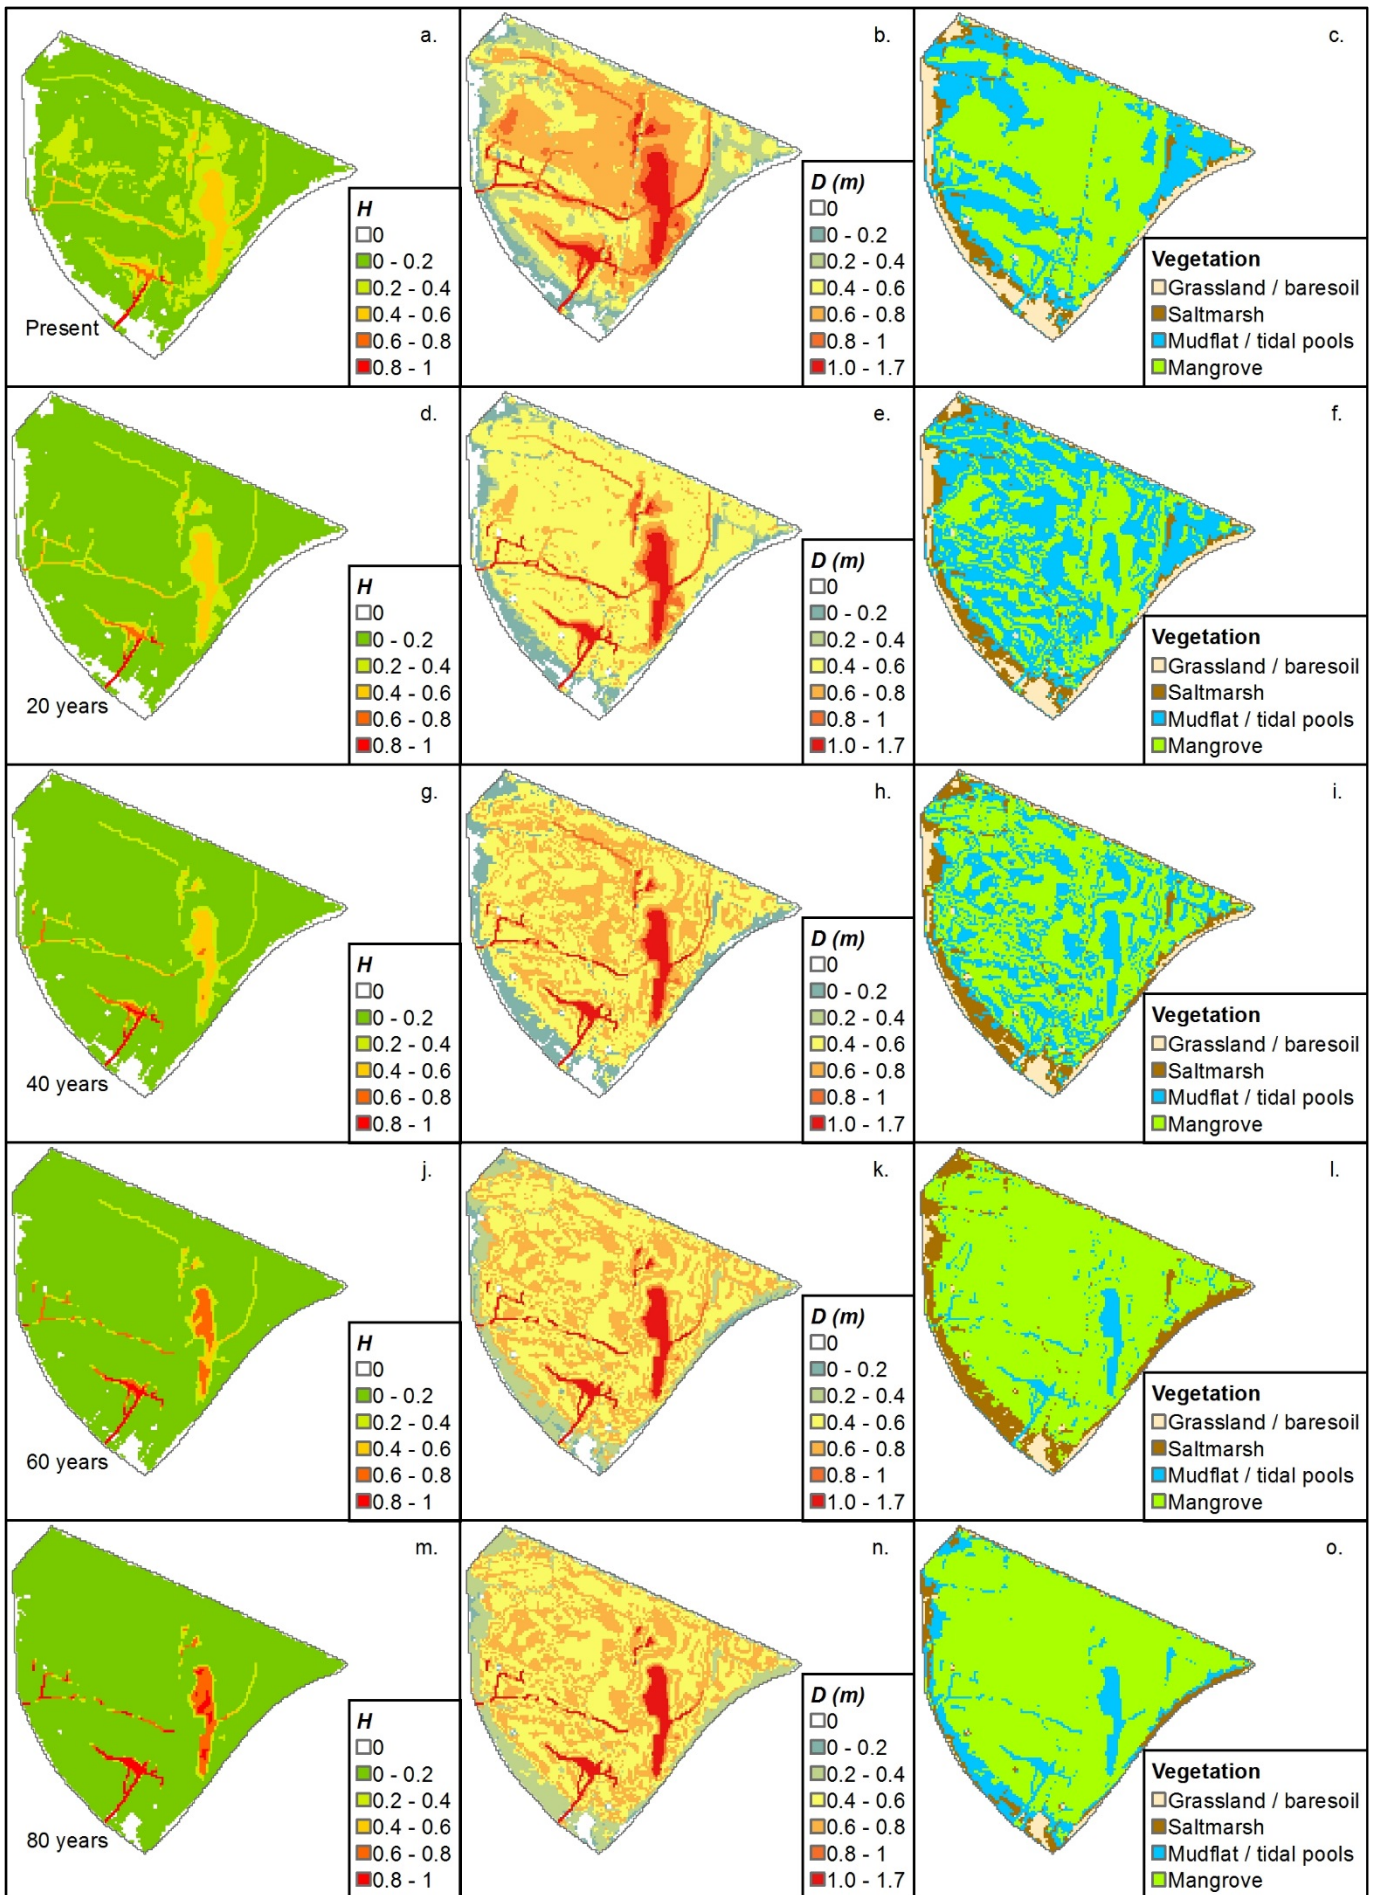

**Supplementary Figure 6 | Long term wetland evolution for variable rate of sea-level rise and variable rate of soil surface elevation change with high sediment load using the “bathtub” approach without considering the effects of flow attenuation.  $H$  = hydroperiod,  $D$  = depth below mean high tide**

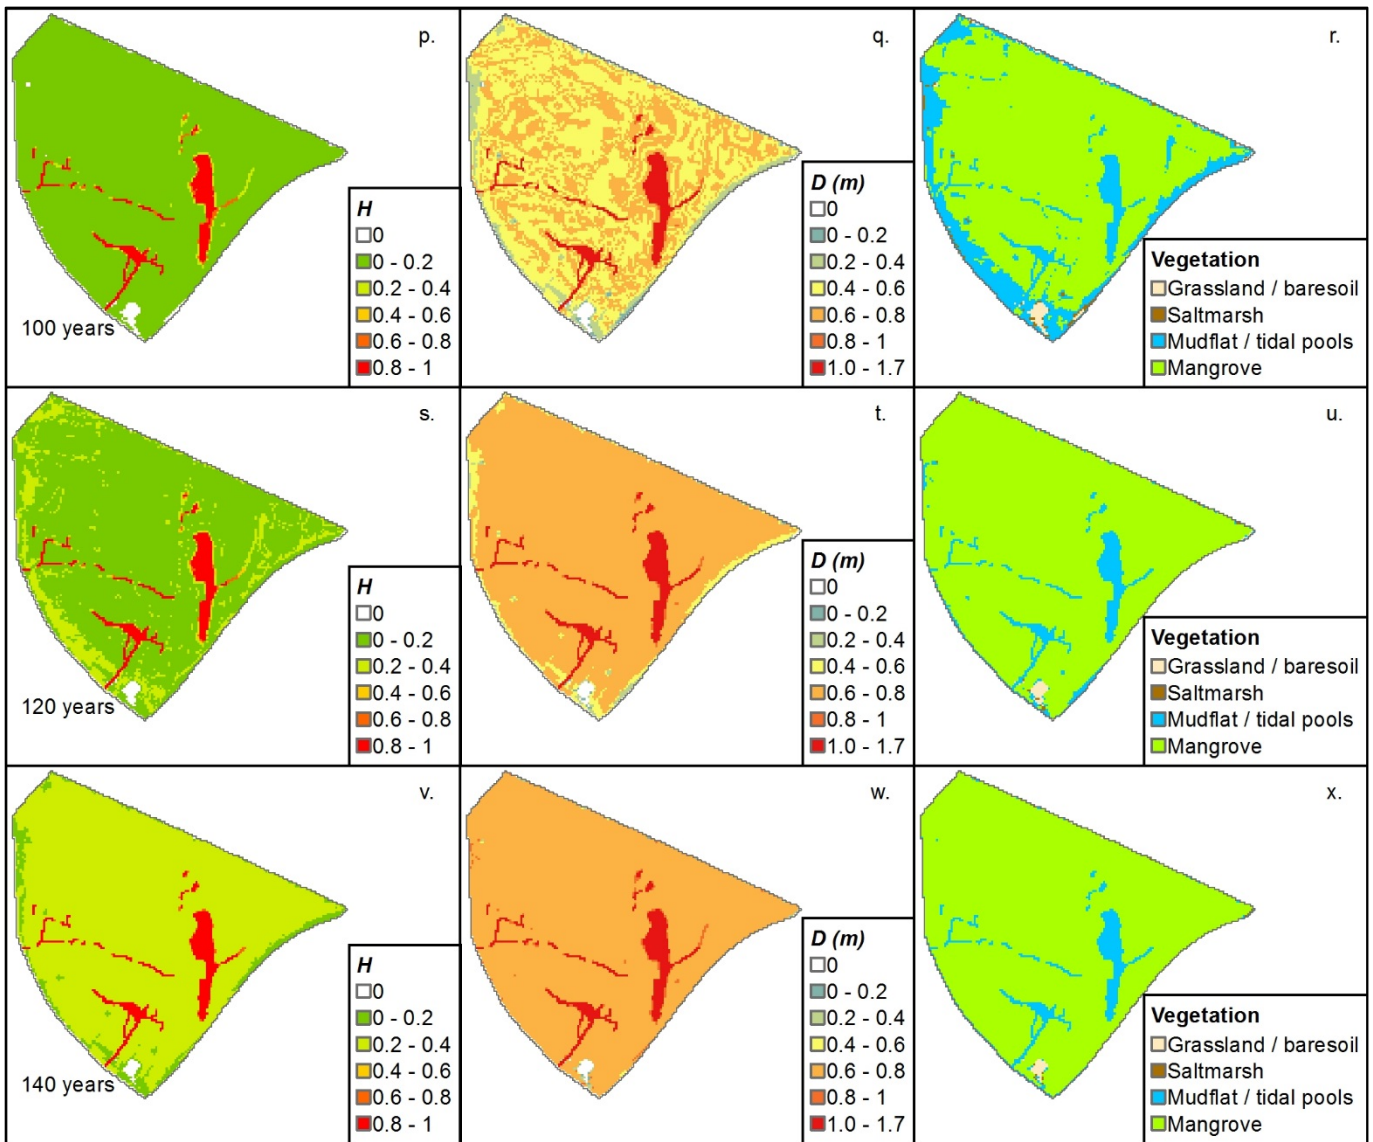

Supplementary Figure 6 (cont.)

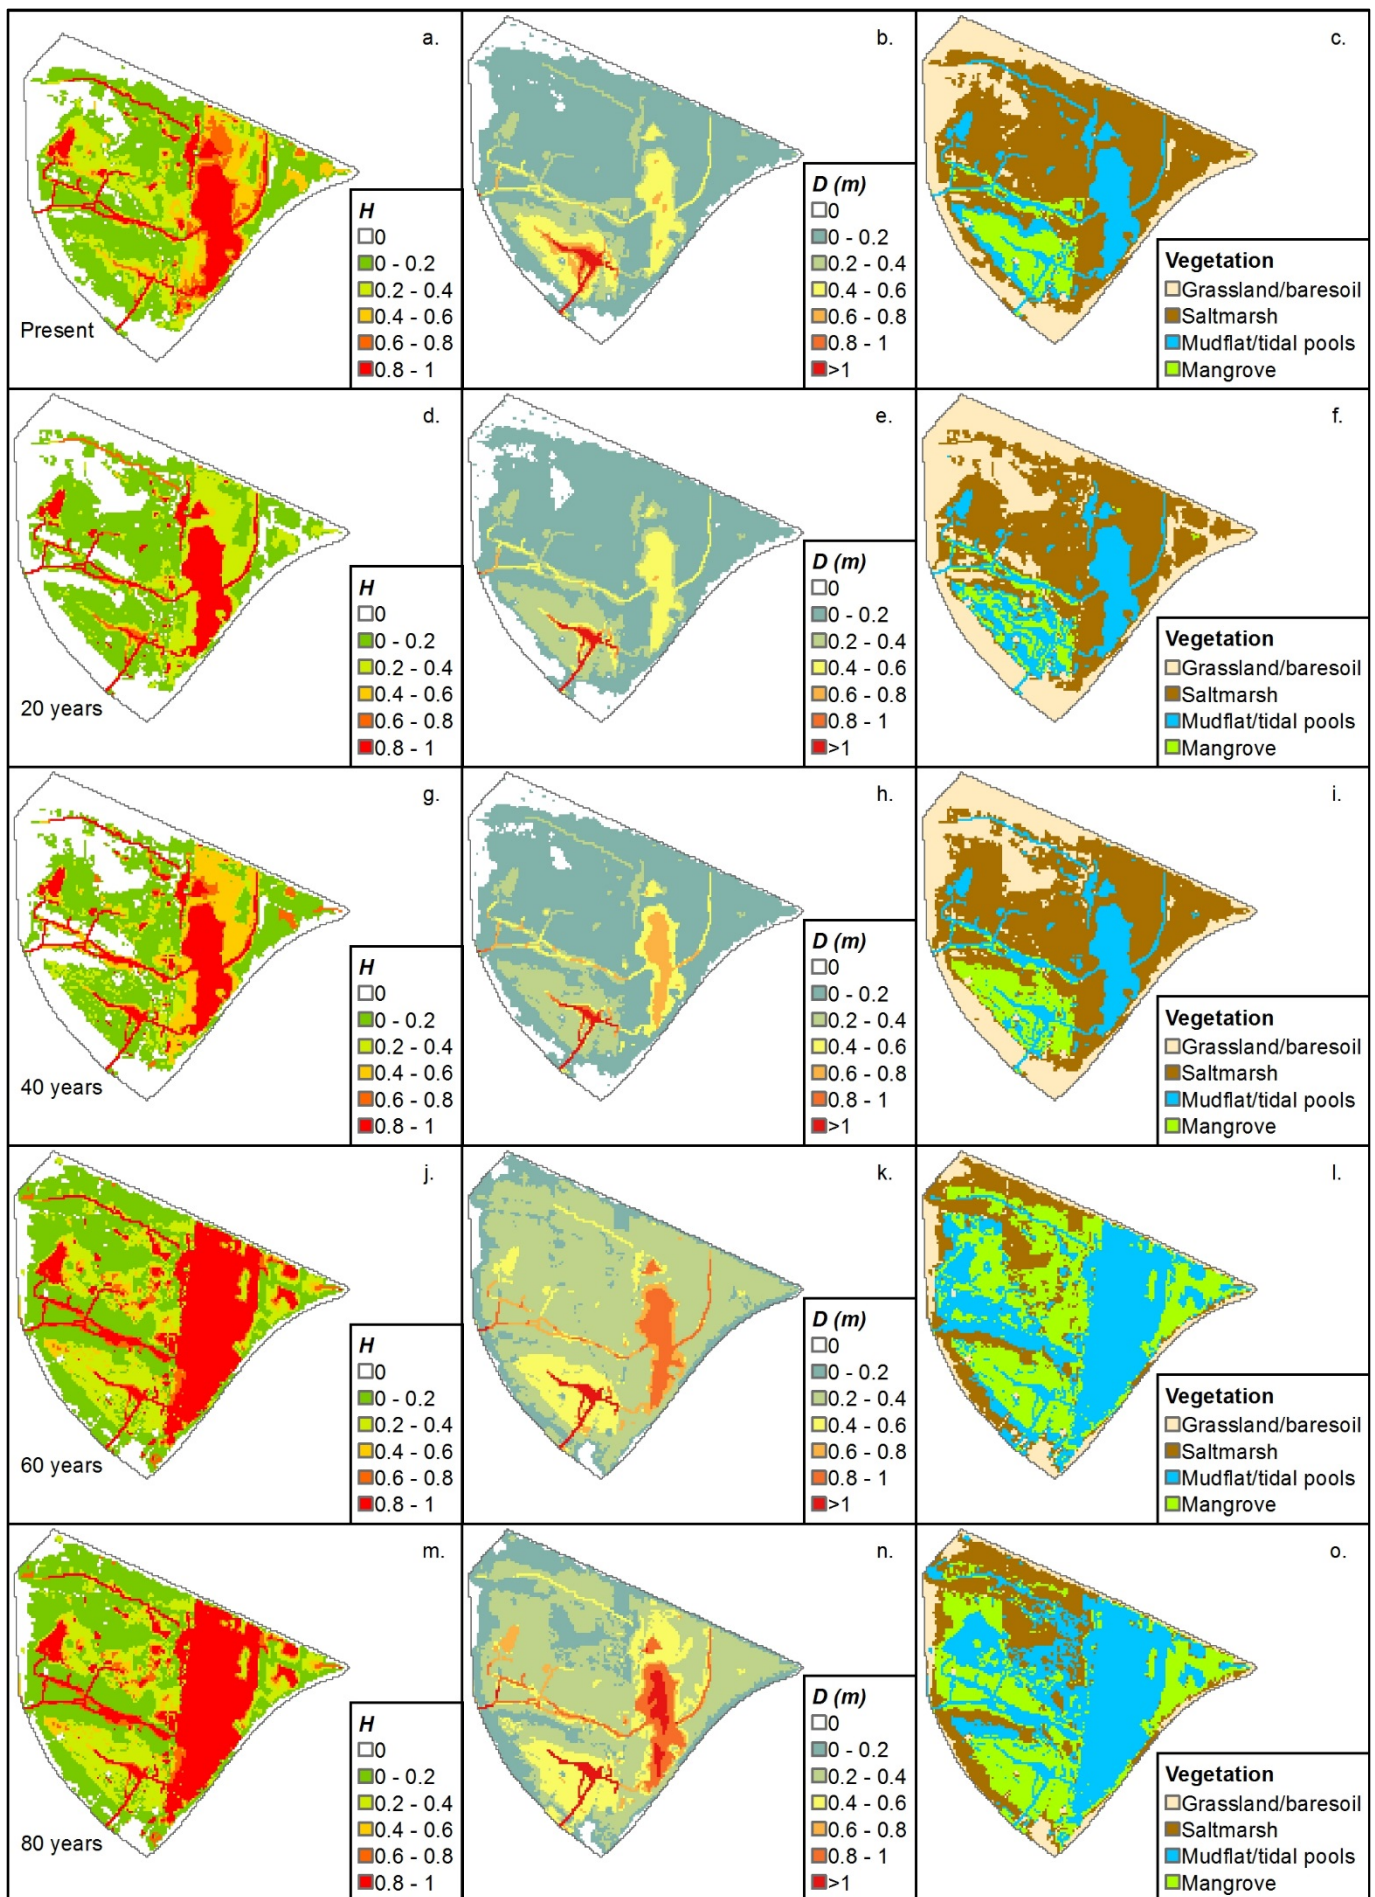

**Supplementary Figure 7 | Long term wetland evolution for variable rate of sea-level rise and variable rate of soil surface elevation change with high sediment load using the hydrodynamic approach considering the full effects of flow attenuation.  $H$  = hydroperiod,  $D$  = depth below mean high tide.**

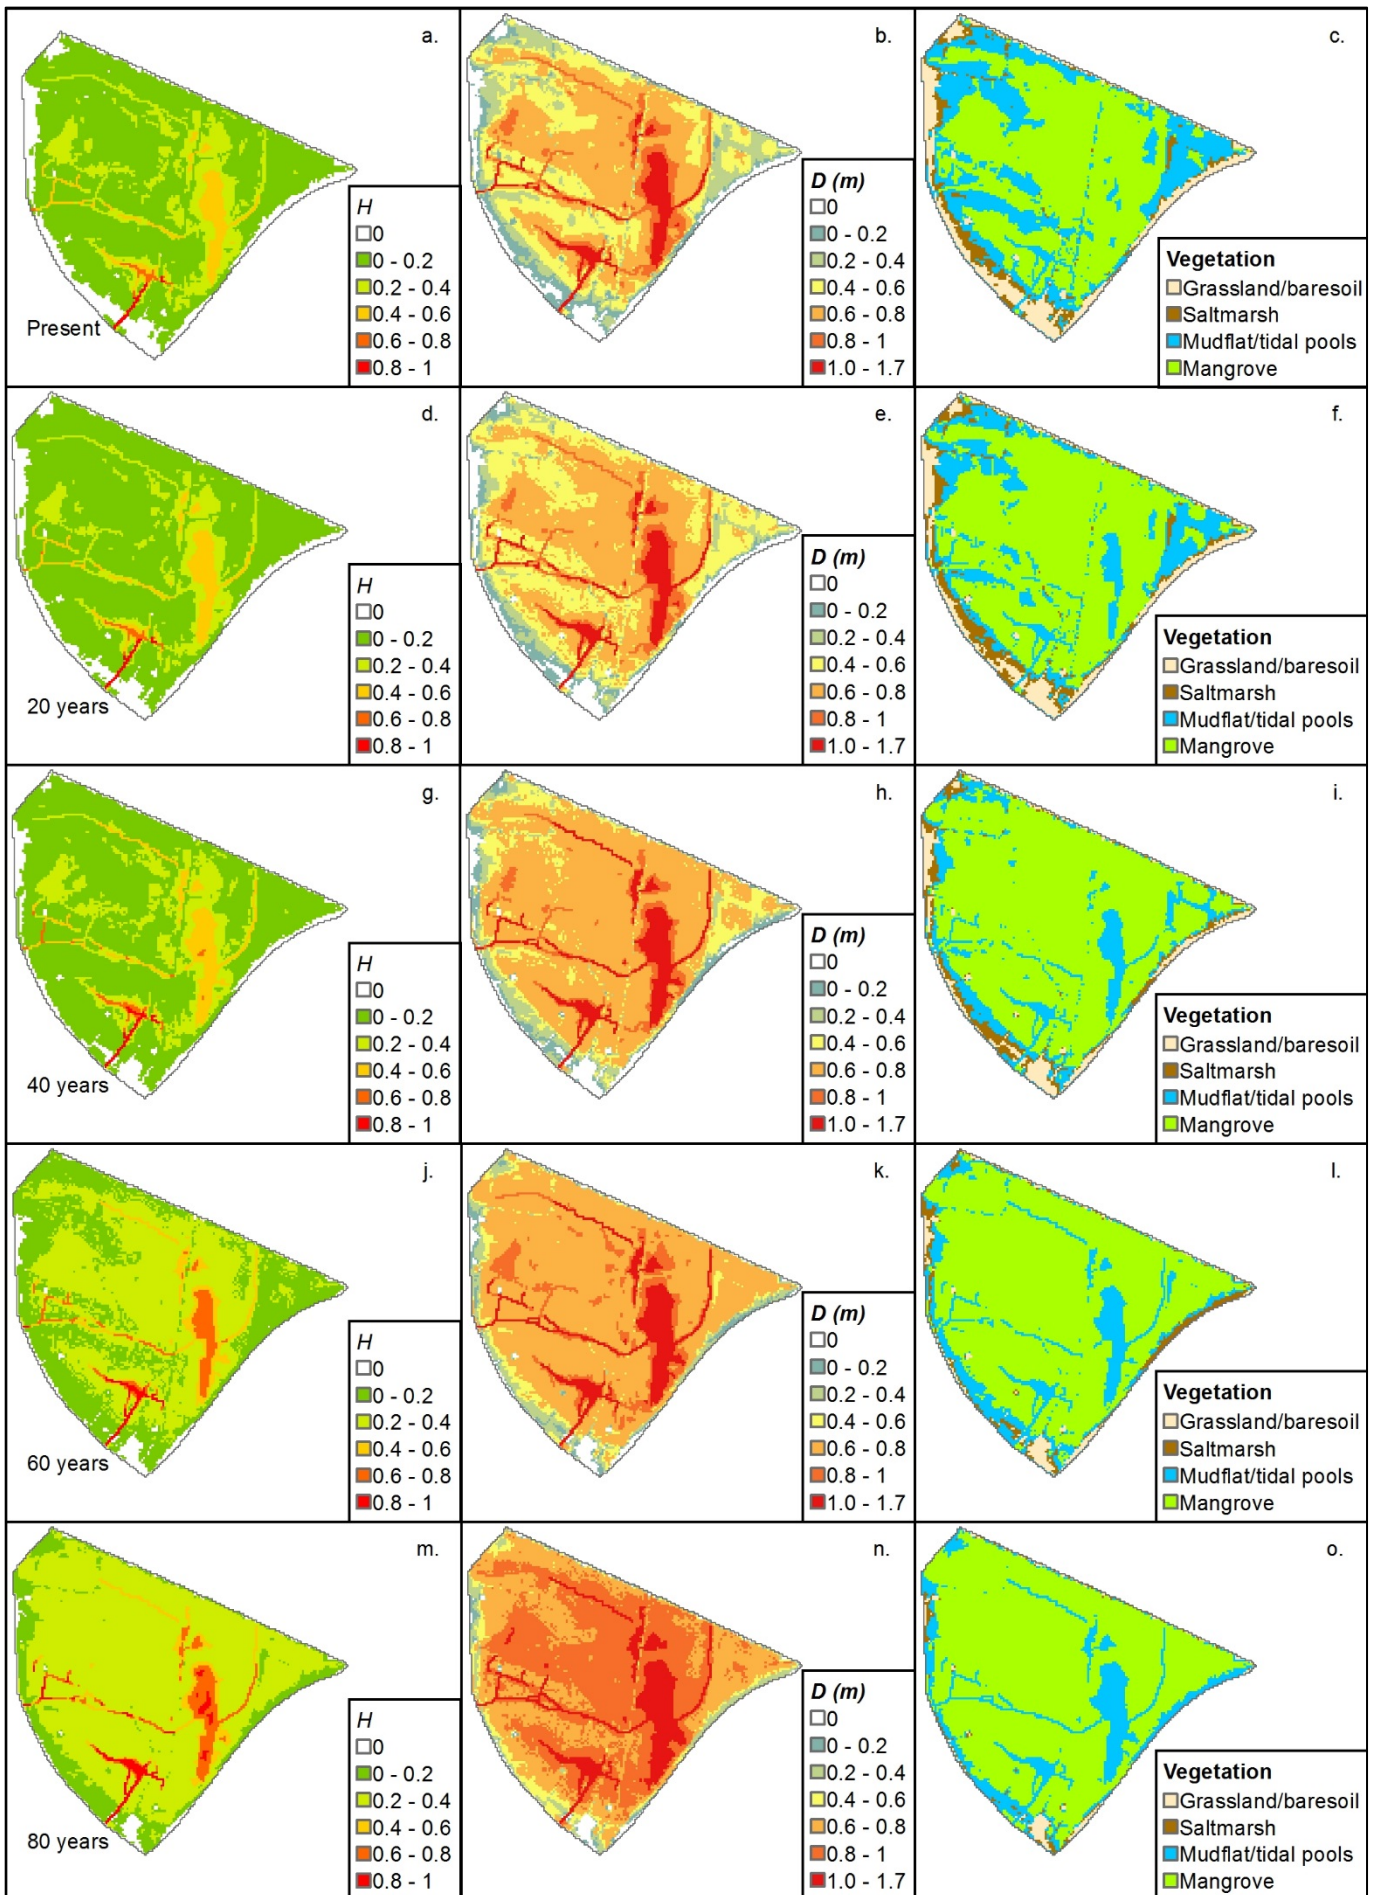

**Supplementary Figure 8 | Long term wetland evolution for variable rate of sea-level rise and variable rate of soil surface elevation change and concentration with low sediment load using the “bathtub” approach without considering the effects of flow attenuation.  $H$  = hydroperiod,  $D$  = depth below mean high tide**

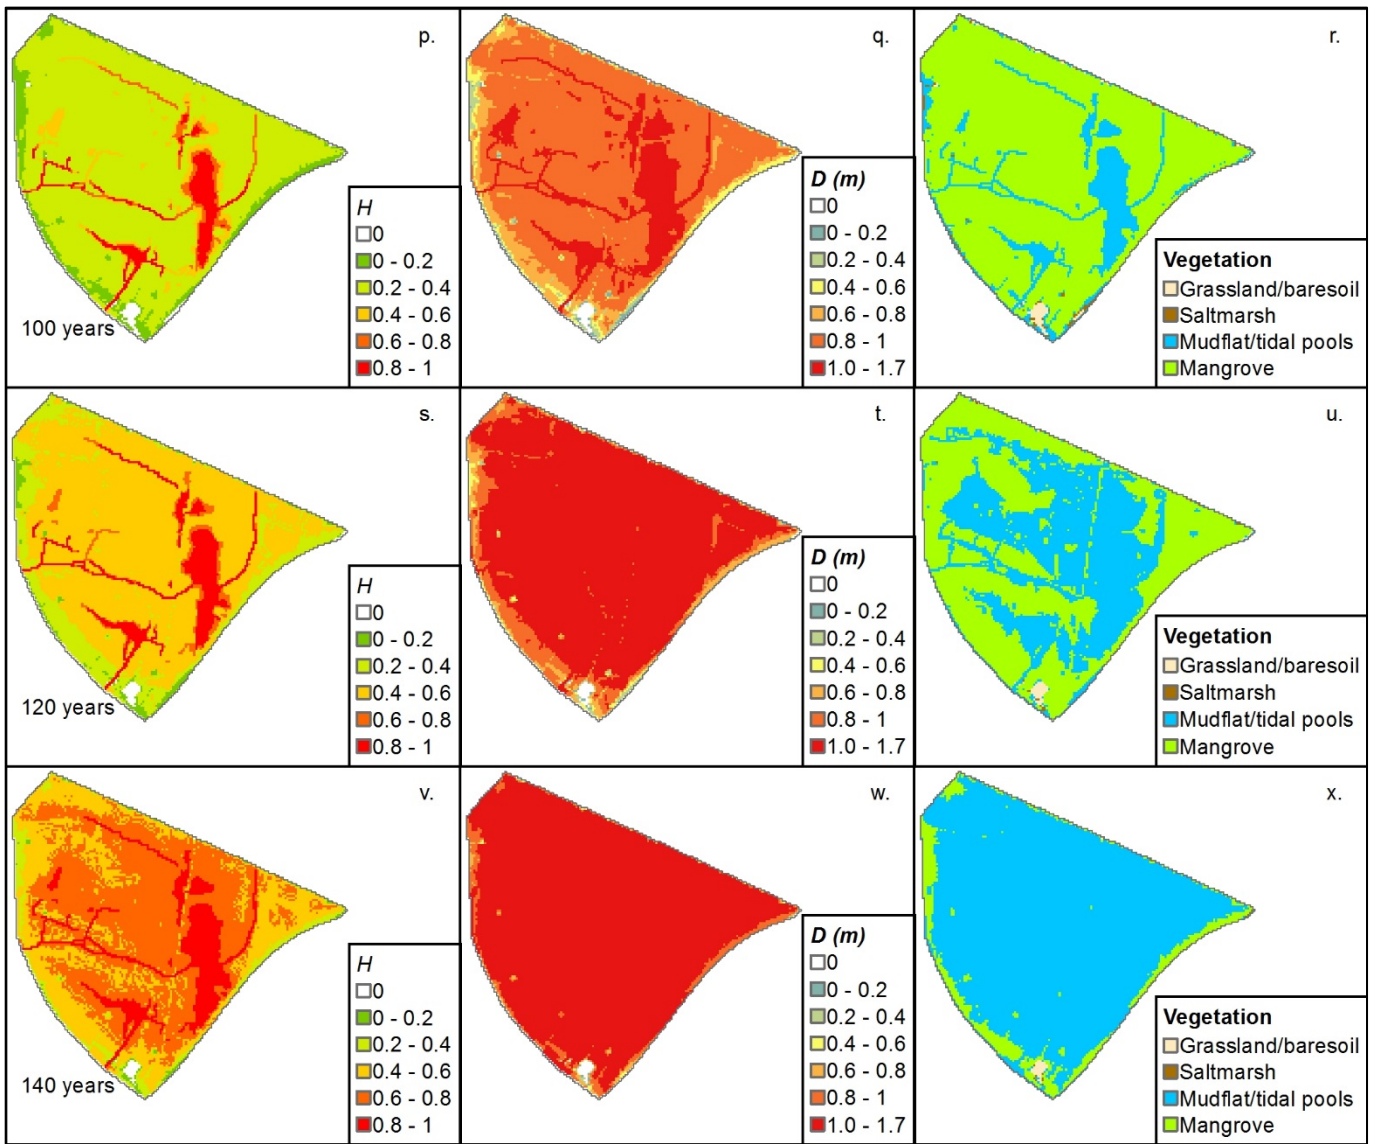

Supplementary Figure 8 (cont.)

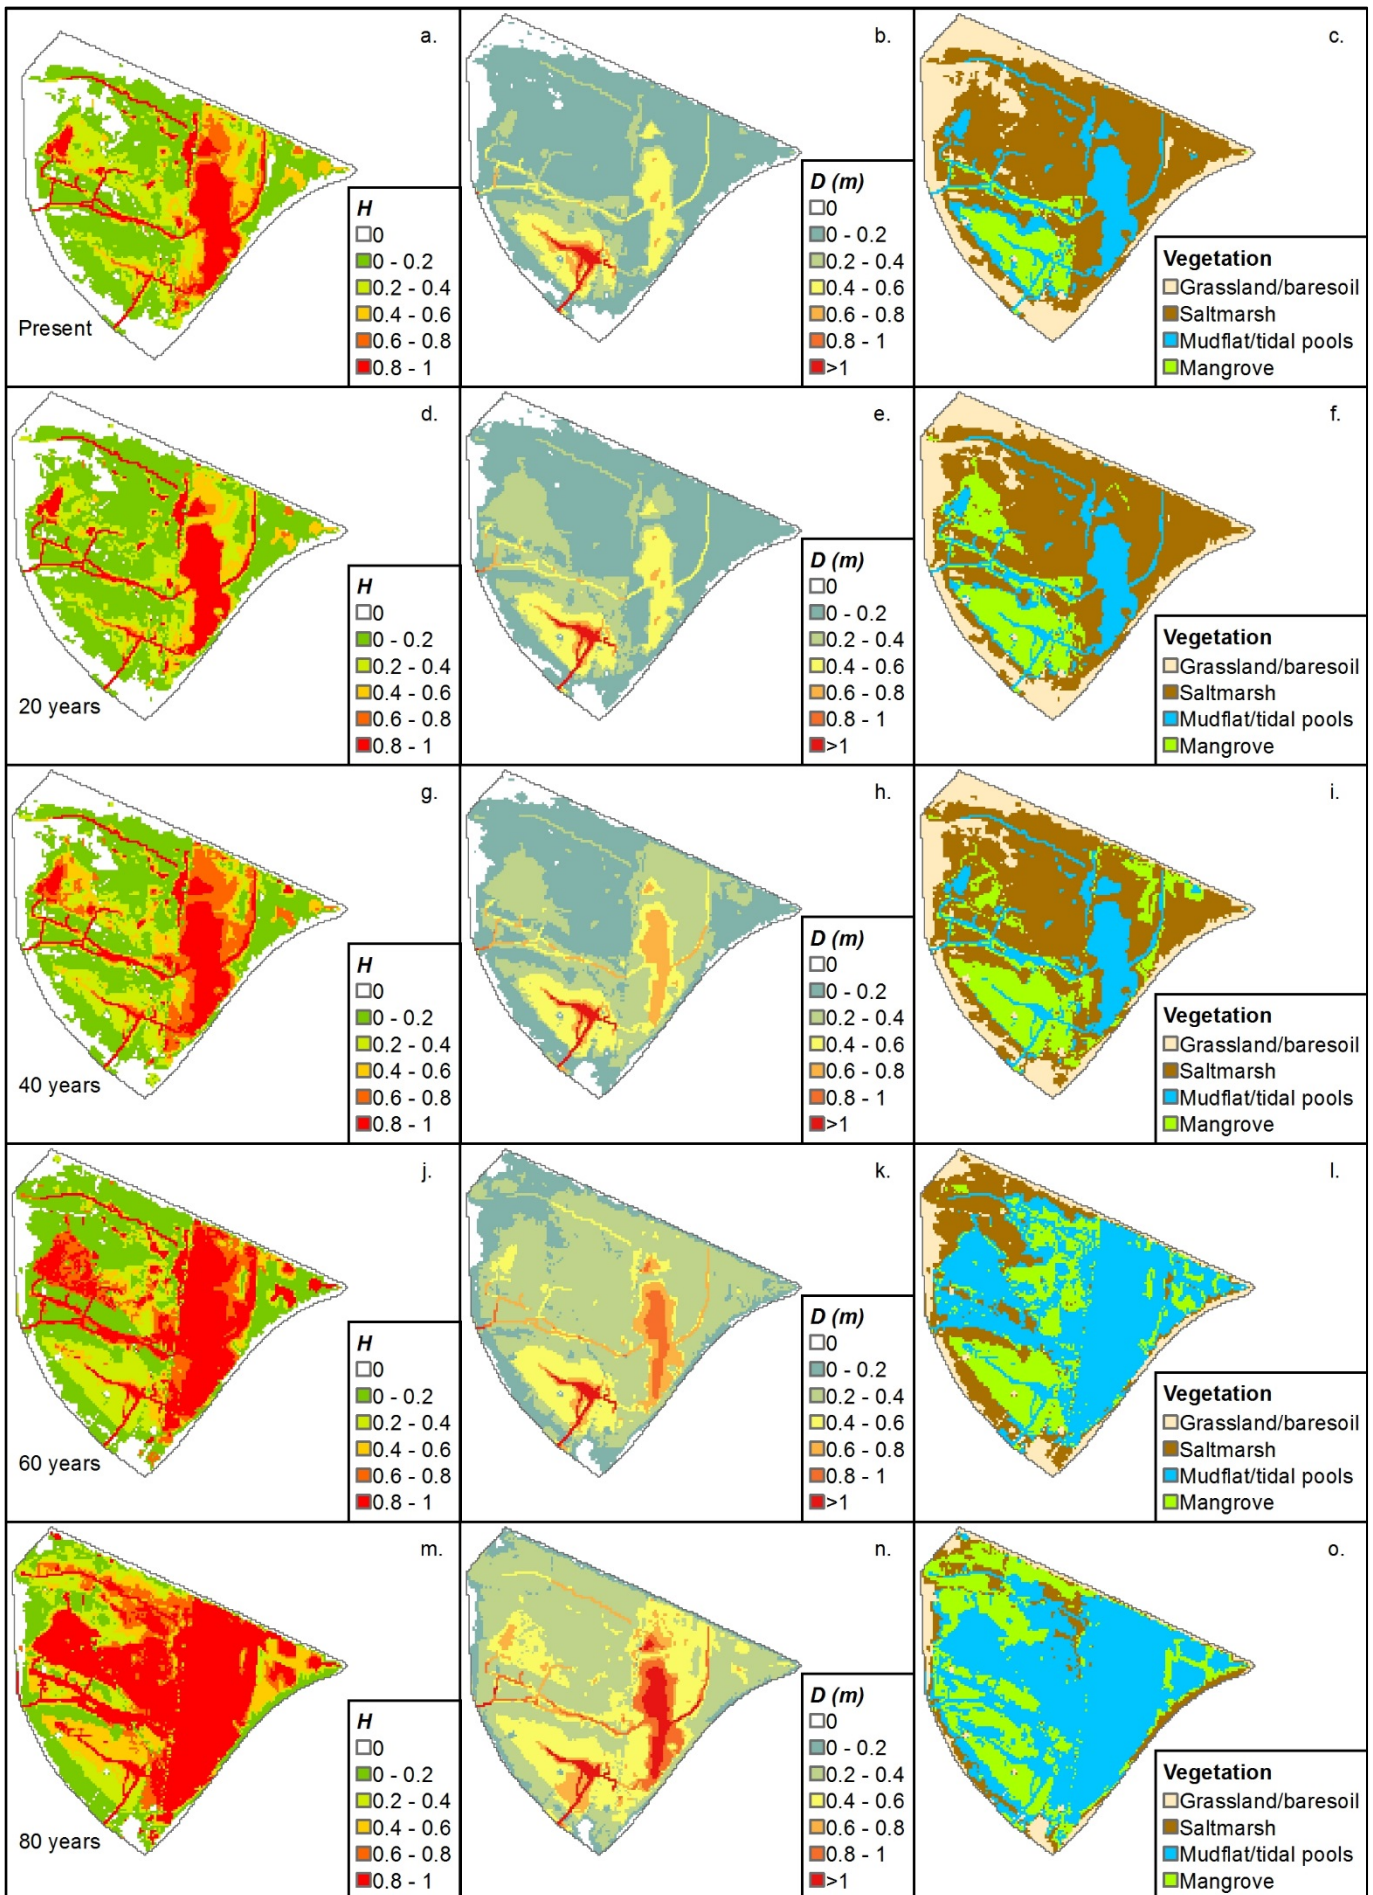

**Supplementary Figure 9 | Long term wetland evolution for variable rate of sea-level rise and variable rate of soil surface elevation change and concentration with low sediment load using the hydrodynamic approach considering the full effects of flow attenuation.  $H$  = hydroperiod,  $D$  = depth below mean high tide.**

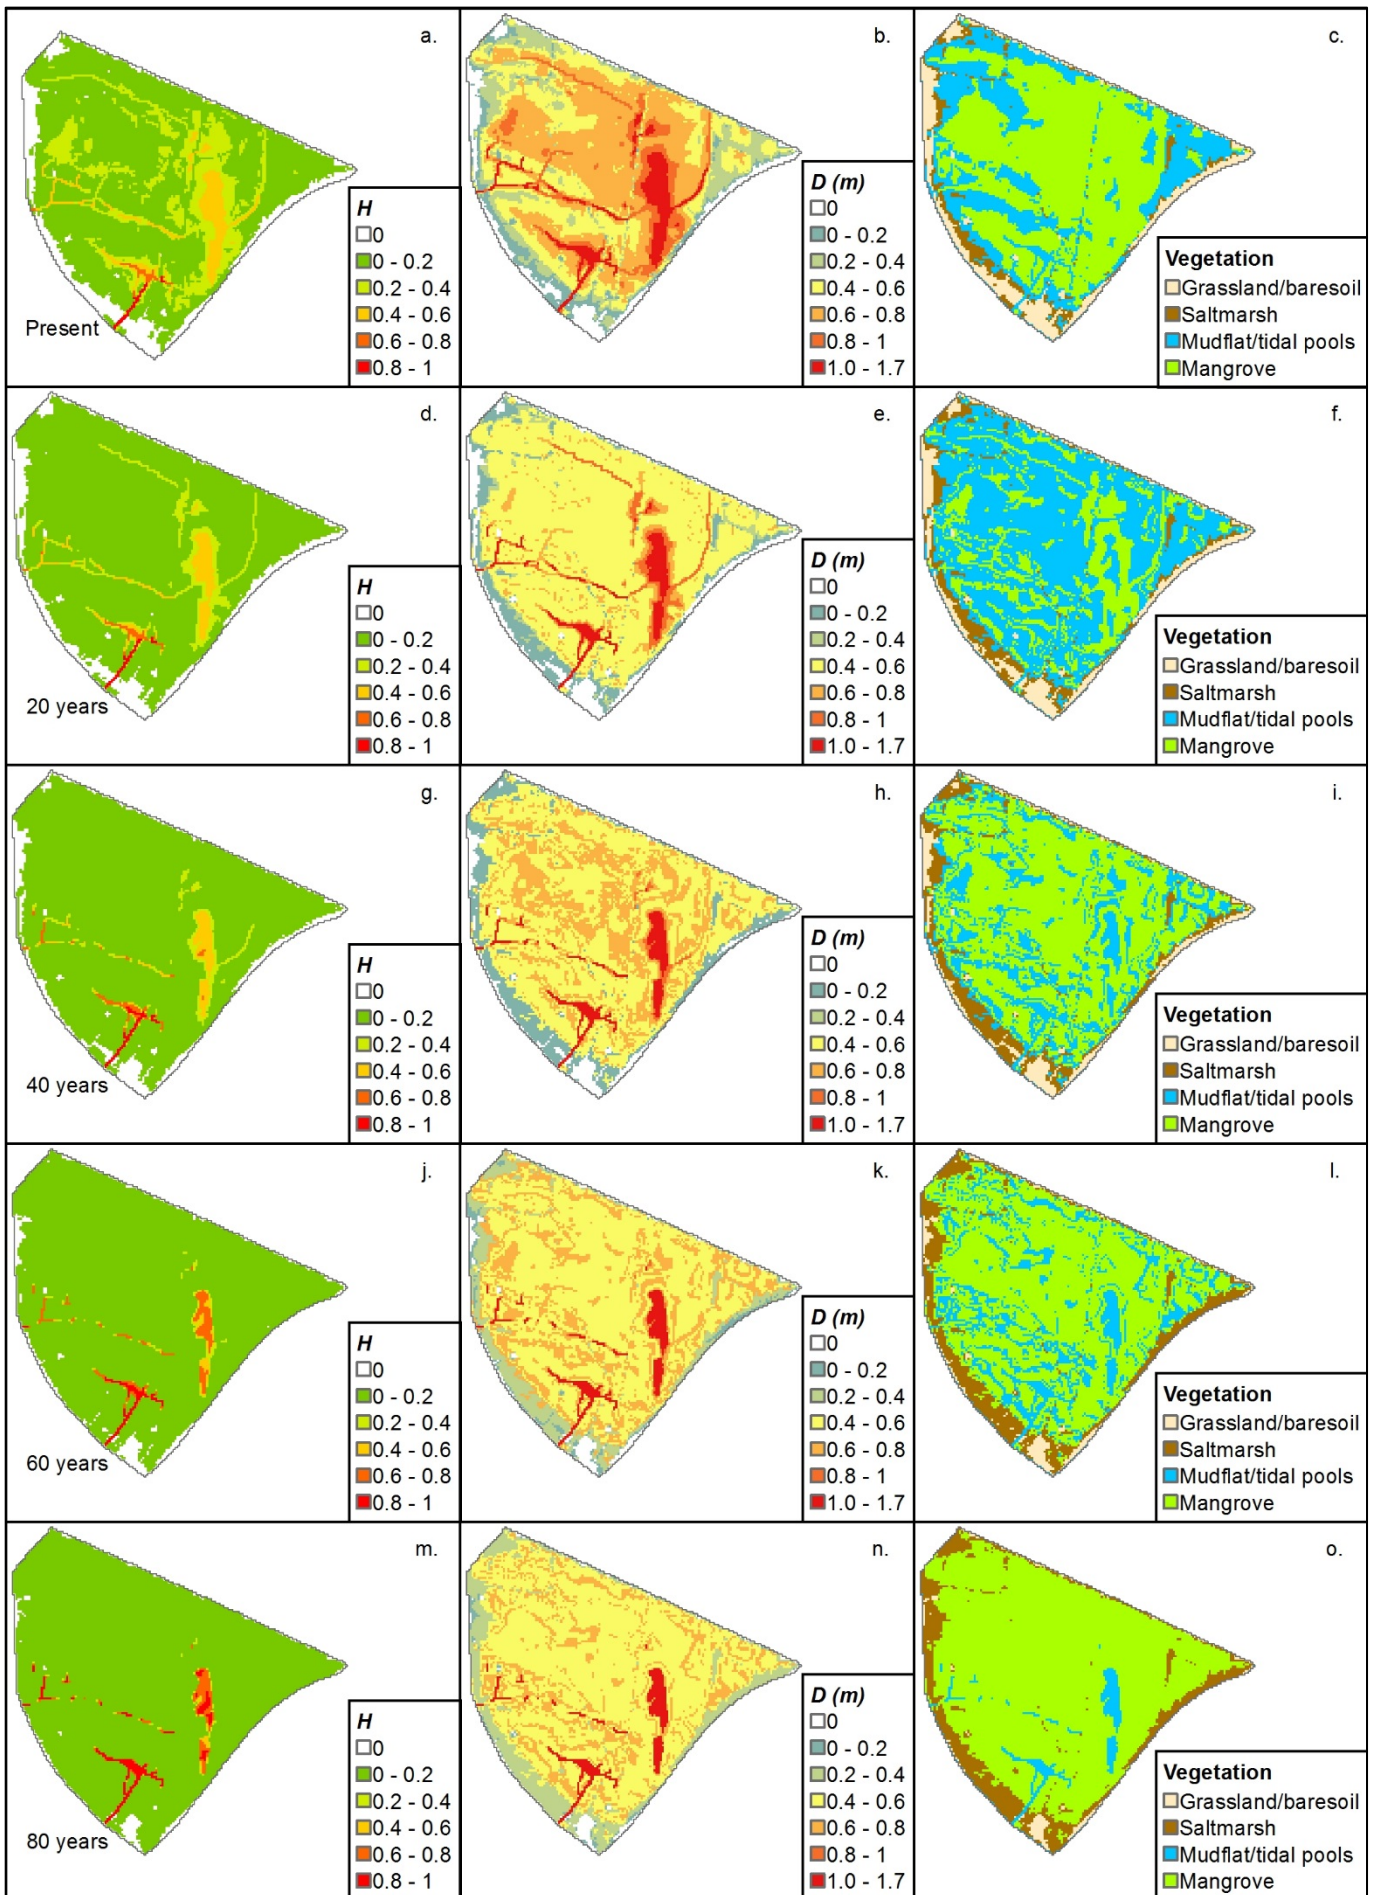

**Supplementary Figure 10 | Long term wetland evolution for variable rate of sea-level rise and variable rate of soil surface elevation change and concentration with high sediment load using the “bathtub” approach without considering the effects of flow attenuation.  $H$  = hydroperiod,  $D$  = depth below mean high tide**

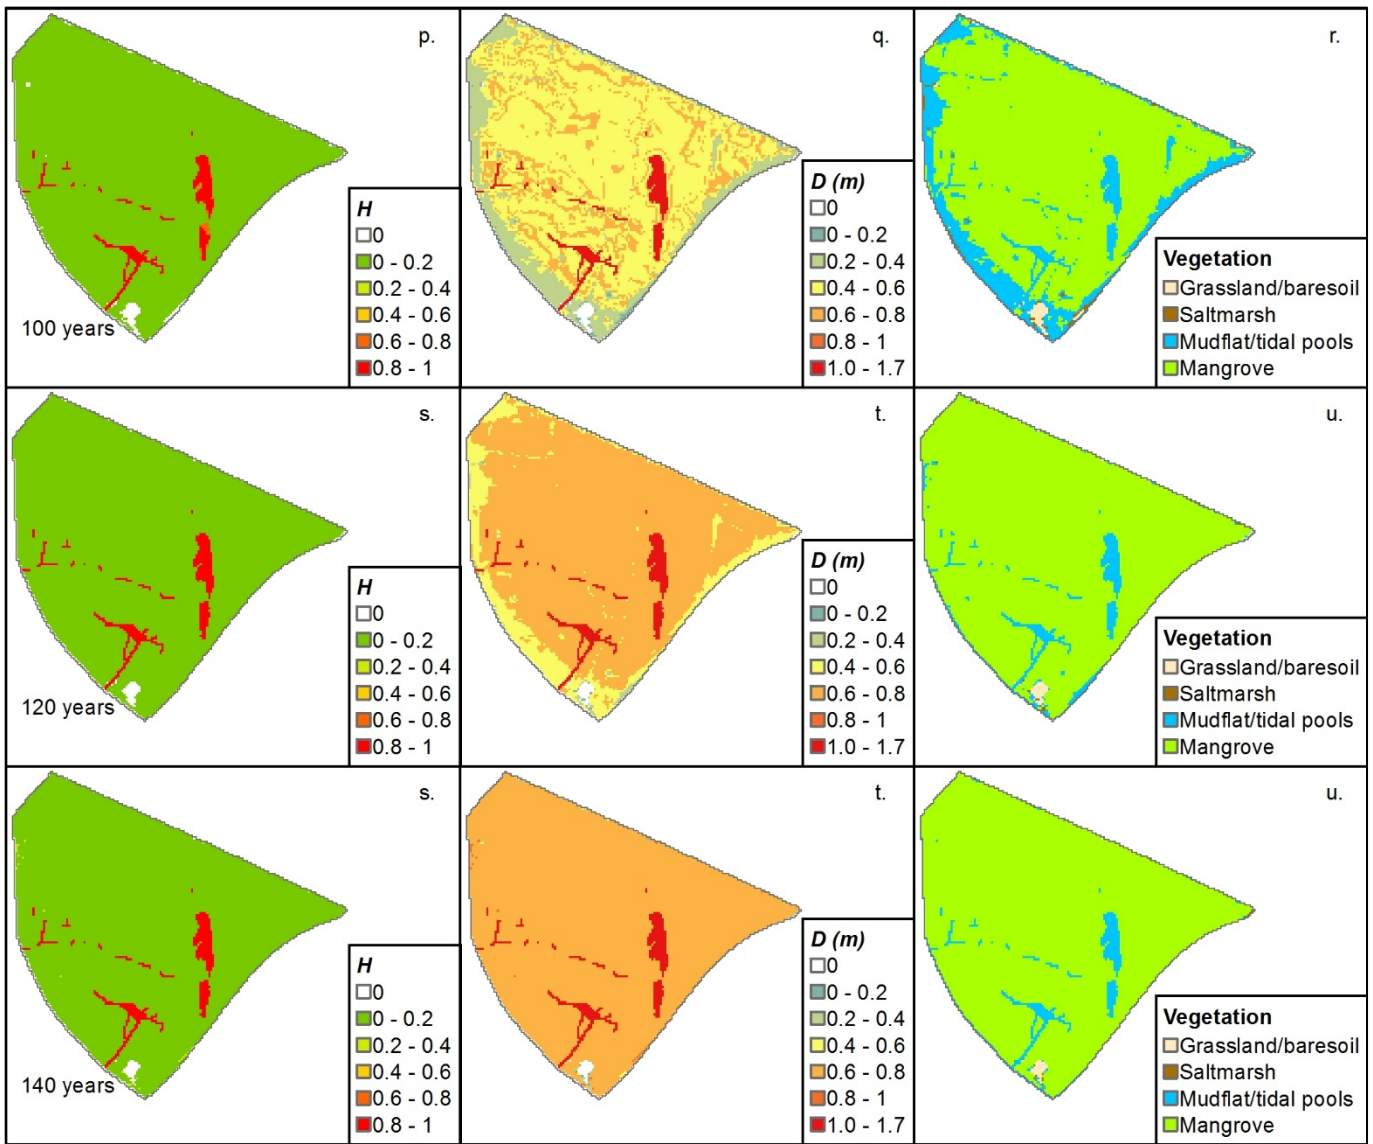

Supplementary Figure 10 (cont.)



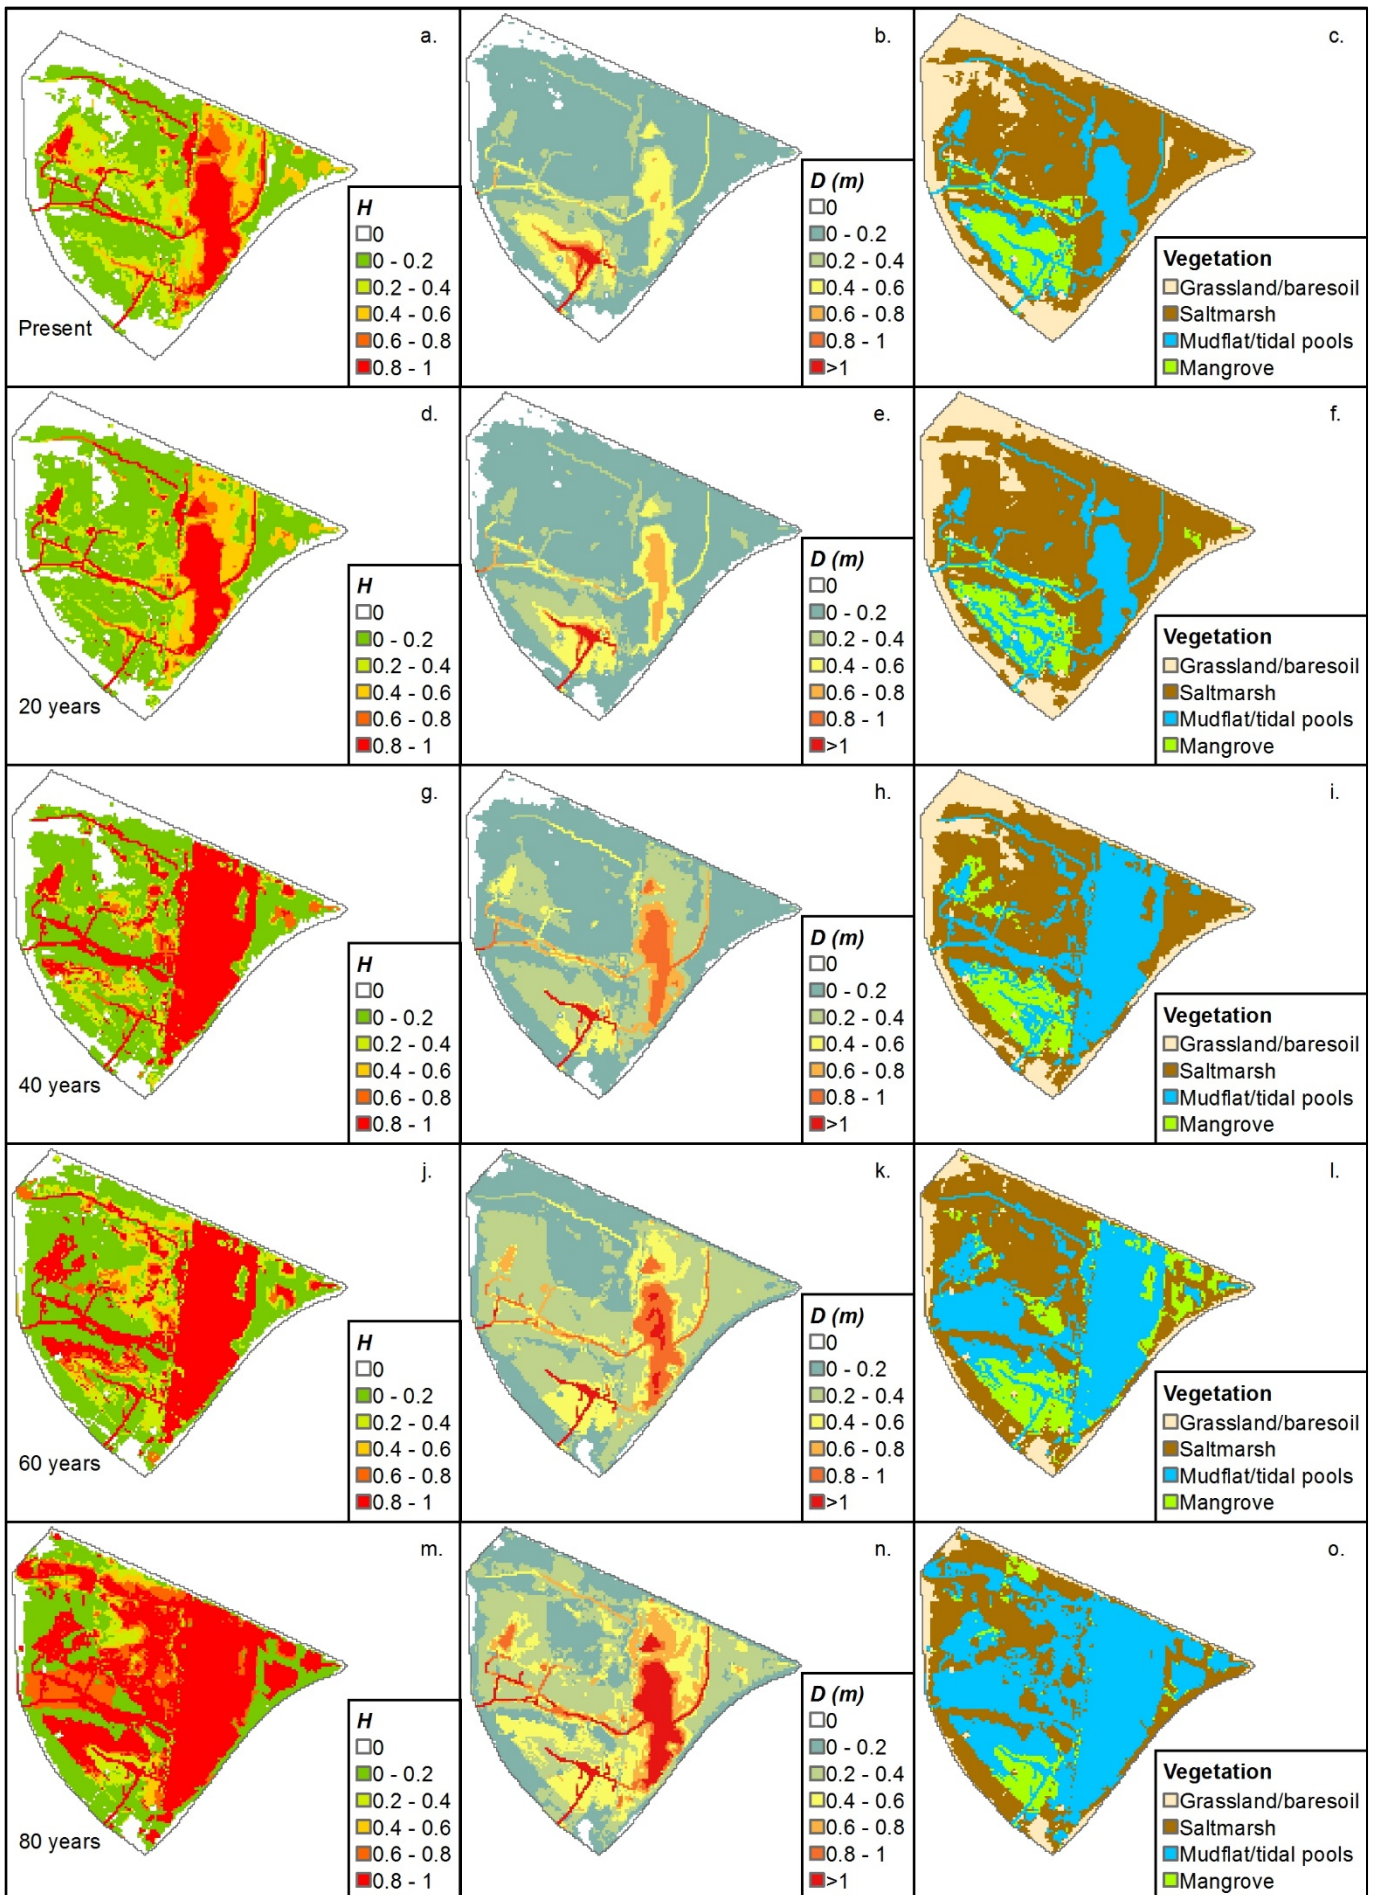

**Supplementary Figure 11 | Long term wetland evolution for variable rate of sea-level rise and variable rate of soil surface elevation change and concentration with high sediment load using the hydrodynamic approach considering the full effects of flow attenuation.  $H$  = hydroperiod,  $D$  = depth below mean high tide.**

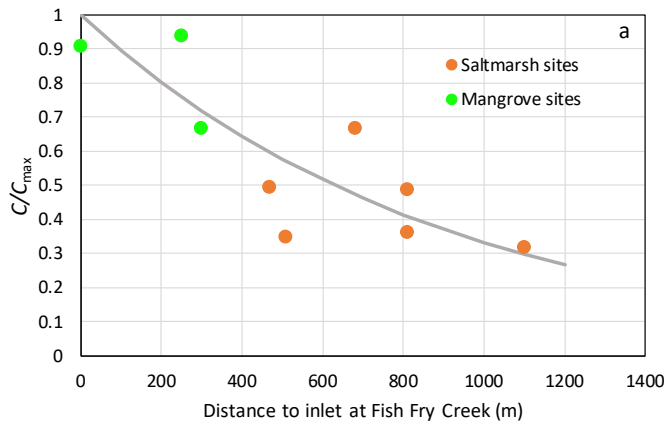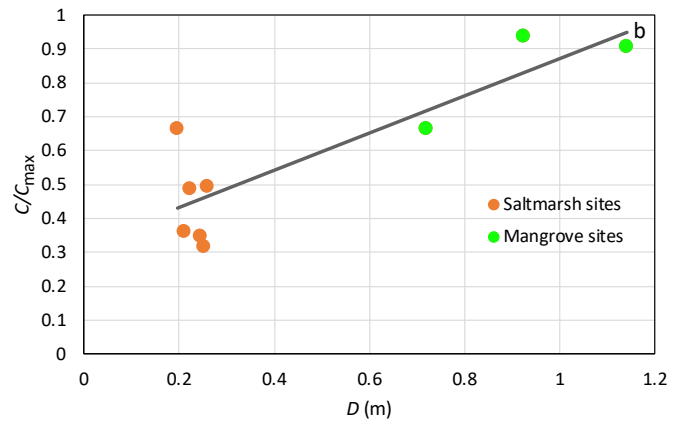

**Supplementary Figure 12 | Variation of suspended sediment in the wetland. a,** Values of suspended sediment concentration decay exponentially with distance to the inlet at Fish Fry Creek, both in saltmarsh and mangrove sites. **b,** The same sites show a linear increase of concentration with depth below mean high tide  $D$ . Lines of best fit have been included in the figures.

**Supplementary Table 1 | Data used during calibration and validation of the hydrodynamic model.**

| Series      | Record period | Initial Date | Final Date |
|-------------|---------------|--------------|------------|
| Calibration | 888 hours     | 12/09/2004   | 20/10/2004 |
| Validation  | 97 hours      | 31/12/2005   | 04/01/2006 |

**Supplementary Table 2 | Manning roughness intervals tested.**

| Type of element / soil coverage     | Roughness coefficient interval | Final calibrated values |
|-------------------------------------|--------------------------------|-------------------------|
| Unvegetated                         | 0.030 – 0.100                  | 0.035                   |
| Mangrove (pneumatophores and stems) | 0.100 – 0.700                  | 0.500                   |
| Saltmarsh                           | 0.100 – 0.500                  | 0.150                   |

**Supplementary Table 3 | Performance indicators of the hydrodynamic model for calibration and validation.**

| Performance indicators | Calibration | Validation |
|------------------------|-------------|------------|
| <i>r</i>               | 0.6         | 0.8        |
| <i>RSR</i>             | 0.1         | 0.7        |
| <i>PBIAS</i> (%)       | 6.1         | 3.4        |
| <i>NSE</i>             | 0.9         | 0.5        |
